# Supplementary material for: Paternal overweight is associated with increased breast cancer risk in daughters in a mouse model
Source: PubMed Central journal article supplement (PMC4919621; doi:10.1038/srep28602), 2016-06-24
Supplement: srep28602-s1.pdf [file srep28602-s1.pdf]

**SUPPLEMENTARY INFORMATION FOR:**

**Paternal overweight is associated with increased breast cancer risk in daughters in a mouse model**

**Camile Castilho Fontelles<sup>1,2</sup>, Elissa Carney<sup>1</sup>, Johan Clarke<sup>1</sup>, Nguyen Nguyen<sup>1</sup>, Chao Yin<sup>1</sup>, Lu Jin<sup>1</sup>, M. Idalia Cruz<sup>1</sup>, Thomas Prates Ong<sup>2</sup>, Leena Hilakivi-Clarke<sup>1</sup> and Sonia de Assis<sup>1\*</sup>**

<sup>1</sup>Department of Oncology, Lombardi Comprehensive Cancer Center, Georgetown University, Washington, DC, USA

<sup>2</sup>Departament of Food and Experimental Nutrition, Faculty of Pharmaceutical Sciences, University of São Paulo and Food Research Center , São Paulo, SP, Brazil.

**\*Corresponding author:**

Sonia de Assis, Ph.D., 3970 Reservoir Road, NW, The Research Building, Room E410, Washington, DC 20057, USA

Phone: (202) 687-9518, Fax: (202) 687-7505, Email: [deassiss@georgetown.edu](mailto:deassiss@georgetown.edu)

1. Supplementary Figures and Tables

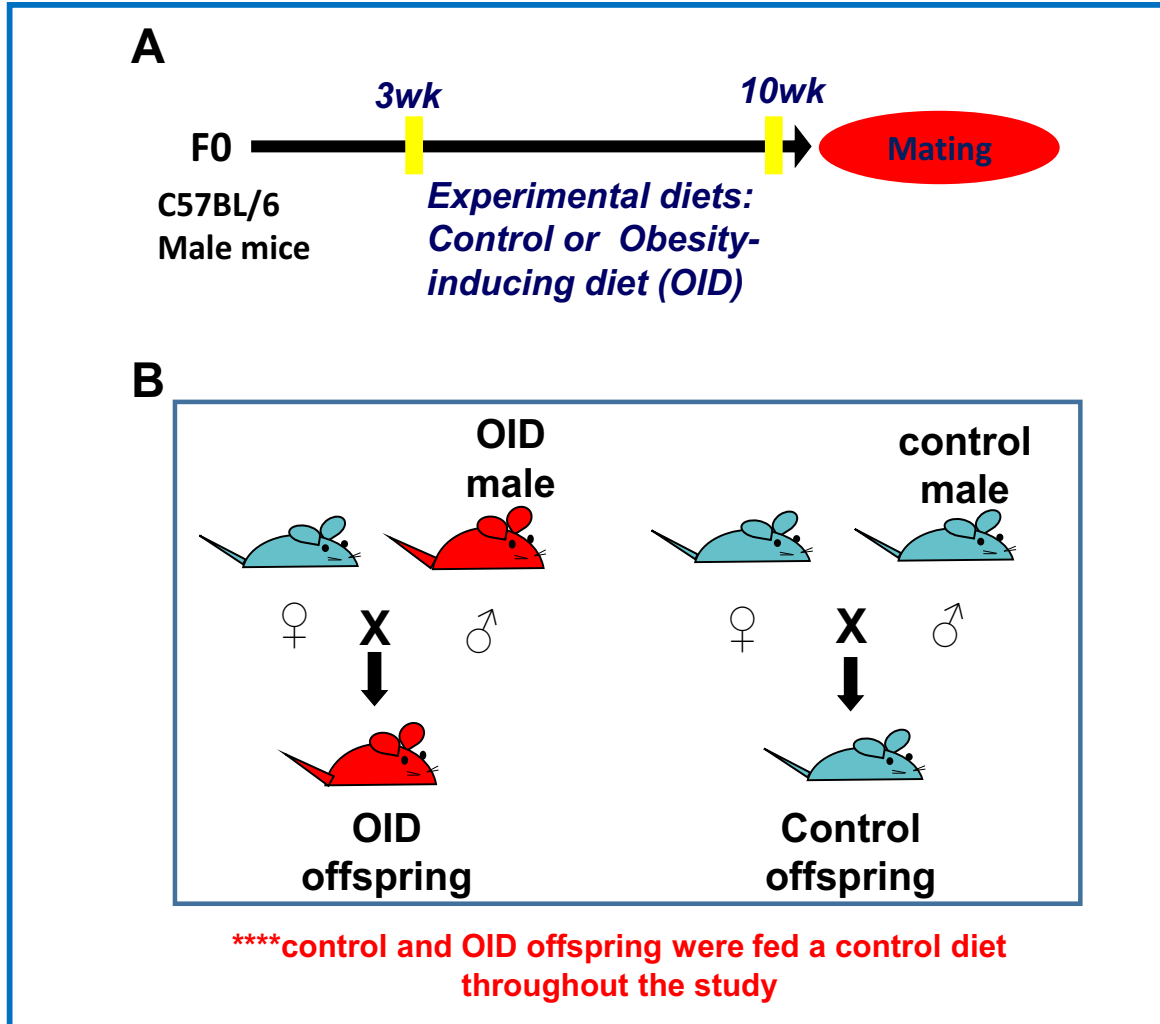

**Figure S1.** Experimental Design: (A) Male mice were fed the experimental diets (control or Obesity-inducing diet, OID) from 3 to 10 weeks of age. (B) At this point, control and OID-fed males were mated to control-fed females to generate the offspring as shown.

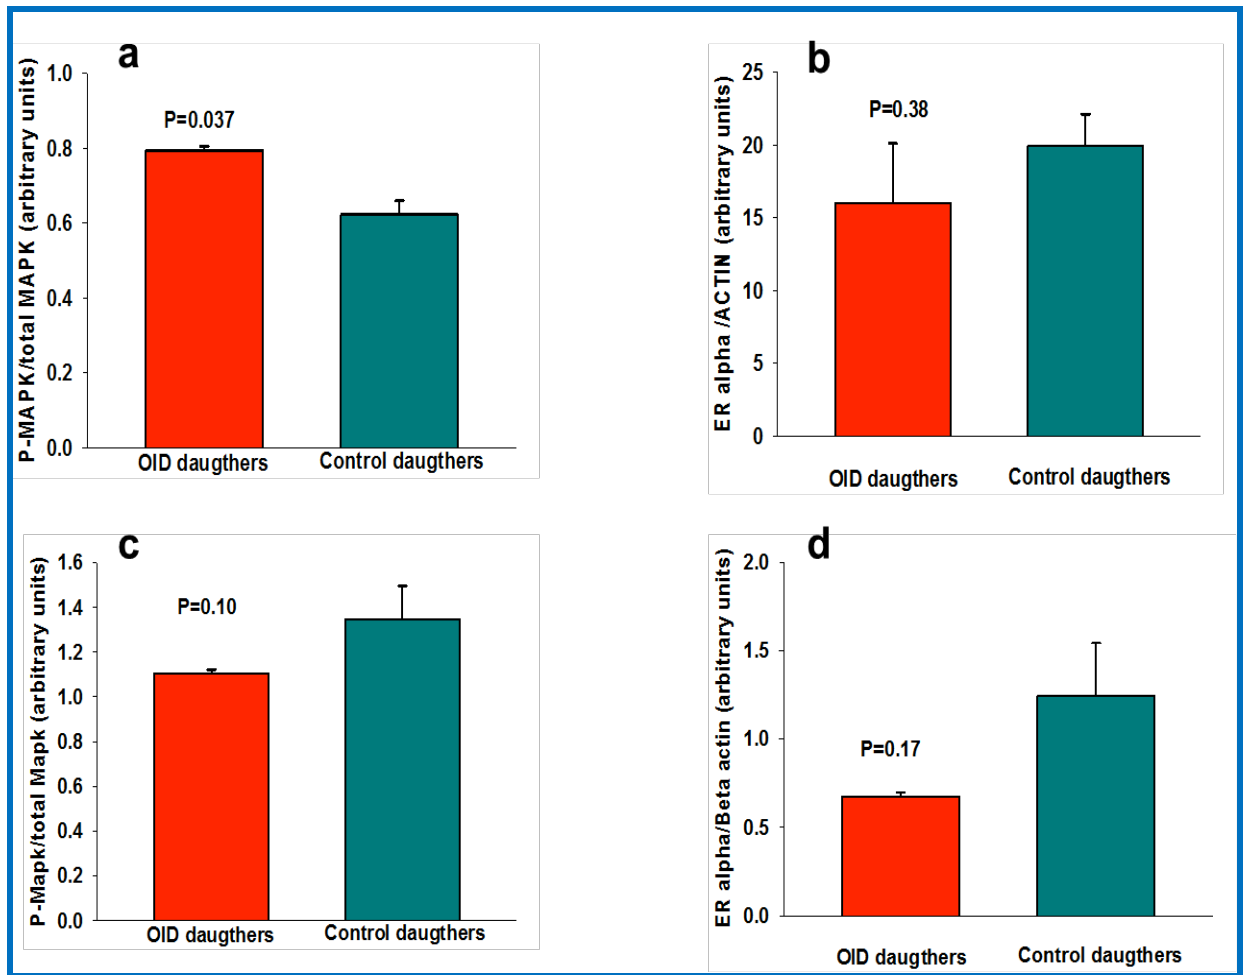

**Figure S2. a-d,** Quantification of MAPK and ER- $\alpha$  expression on PND50 in mammary tissue (a,b) and mammary tumors (c,d) of control and OID offspring. All data are mean  $\pm$  s.e.m. Significant differences versus the control group by t-test.  $P < 0.05$  is considered significant; exact  $P$  values are shown in each plot.

| Control Group | Base-line weight | Final weight | Net weight gain |
|---------------|------------------|--------------|-----------------|
| 1             | 8.5              | 23           | 14.5            |
| 2             | 8.7              | 28.1         | 19.4            |
| 3             | 10.2             | 25.2         | 15              |
| 4             | 8.9              | 24.3         | 15.4            |
| 5             | 10.6             | 27           | 16.4            |
| 6             | 9.8              | 26.5         | 16.7            |
| 7             | 9.8              | 27.9         | 18.1            |
| 8             | 7.4              | 24           | 16.6            |
| 9             | 10               | 27.8         | 17.8            |
| 10            | 9.4              | 25.5         | 16.1            |
| 11            | 7.9              | 25.7         | 17.8            |
| Mean          | <b>9.2</b>       | <b>25.9</b>  | <b>16.7</b>     |
| OID Group     | Base-line weight | Final weight | Net weight gain |
| 1             | 9.6              | 30.7         | 21.1            |
| 2             | 9                | 29.6         | 20.6            |
| 3             | 8.3              | 26.9         | 18.6            |
| 4             | 9.6              | 33.3         | 23.7            |
| 5             | 7.9              | 30.5         | 22.6            |
| 6             | 9.8              | 30.2         | 20.4            |
| 7             | 10.4             | 34.8         | 24.4            |
| 8             | 8.8              | 29.6         | 20.8            |
| 9             | 10.5             | 30.5         | 20              |
| 10            | 10.1             | 28.5         | 18.4            |
| 11            | 9.6              | 32.7         | 23.1            |
| Mean          | <b>9.4</b>       | <b>30.7</b>  | <b>21.2</b>     |

**Table S1. Paternal body weight** at base-line (3 weeks of age) and before mating (10 weeks of age) in OID (n=11) and control (n=11) groups.

| miRNA                   | Fold-difference |
|-------------------------|-----------------|
| mmu-miR-146b#-002453    | <b>9.13</b>     |
| mmu-miR-29a-002112      | <b>-158.31</b>  |
| mmu-miR-345-001137      | <b>-2.81</b>    |
| mmu-miR-1938-121194_mat | <b>-4.66</b>    |
| mmu-miR-190-000489      | <b>-2.59</b>    |
| mmu-miR-761-002030      | <b>-8.58</b>    |
| mmu-miR-874-002268      | <b>-4.24</b>    |
| mmu-miR-205-000509      | <b>-1.89</b>    |
| mmu-miR-1896-121128_mat | <b>-4.79</b>    |
| mmu-miR-345-5p-002528   | <b>-1.73</b>    |
| mmu-miR-296-5p-000527   | <b>-3.50</b>    |

**Table S2. List of microRNAs differentially expressed in OID fathers' sperm.** miRNA that has  $fdr < 0.1$  ( $p < 0.05$ ) were considered as significantly regulated miRNAs.

| <b>Control group</b> | <b>Number of TEBs</b> |
|----------------------|-----------------------|
| 1                    | <b>10</b>             |
| 2                    | <b>10</b>             |
| 3                    | <b>6</b>              |
| 4                    | <b>7</b>              |
| 5                    | <b>12</b>             |
| 6                    | <b>11</b>             |
| <b>Mean</b>          | <b>9.3</b>            |
| <b>SD</b>            | <b>2.3</b>            |
| <b>OID group</b>     | <b>Number of TEBs</b> |
| 1                    | <b>11</b>             |
| 2                    | <b>16</b>             |
| 3                    | <b>20</b>             |
| 4                    | <b>12</b>             |
| 5                    | <b>16</b>             |
| <b>Mean</b>          | <b>15*</b>            |
| <b>SD</b>            | <b>3.6</b>            |

**Table S3. Number of terminal end buds (TEBs, inguinal mammary gland) per animal in control and OID daughters.** Significant differences versus the control group tested by t-test. \* $P < 0.05$  is considered significant; SD, Standard Deviation.

| <b>miRNA</b>               | <b>Fold-difference</b> |
|----------------------------|------------------------|
| mmu-miR-327-002481         | <b>-4.71</b>           |
| mmu-miR-677-001660         | <b>7.32</b>            |
| mmu-miR-376a-001069        | <b>-2.45</b>           |
| mmu-miR-1839-5p-121135_mat | <b>-1.91</b>           |
| mmu-miR-375-000564         | <b>1.97</b>            |
| mmu-miR-872-002264         | <b>-1.15</b>           |
| rno-miR-148b-5p-002058     | <b>-3.43</b>           |
| mmu-miR-98-000577          | <b>-248641.51</b>      |
| mmu-miR-692-001679         | <b>-2.85</b>           |
| mmu-miR-1897-5p-121199_mat | <b>-2480.46</b>        |
| mmu-miR-599-241117_mat     | <b>10.95</b>           |
| mmu-miR-10b-001181         | <b>-1.41</b>           |

|                           |         |
|---------------------------|---------|
| mmu-miR-685-001670        | -2.11   |
| mmu-miR-218-1#-002552     | -1.67   |
| mmu-miR-701-001635        | -2.18   |
| rno-miR-327-001328        | -848.32 |
| mmu-miR-127-000452        | -1.98   |
| mmu-miR-874-002268        | -24.02  |
| mmu-miR-337-3p-002532     | -2.15   |
| mmu-let-7g-002282         | -1.59   |
| mmu-miR-1896-121128 mat   | -1.47   |
| hsa-miR-671-5p-197646 mat | -1.49   |
| hsa-miR-183#-002270       | 1.53    |
| mmu-miR-338-3p-002252     | -1.70   |
| mmu-miR-296-5p-000527     | -2.17   |
| mmu-miR-217-001133        | 6.24    |
| mmu-miR-487b-001306       | -1.66   |
| mmu-miR-21#-002493        | -4.00   |
| hsa-miR-493-3p-001282     | -7.74   |
| mmu-miR-365-001020        | -1.93   |
| mmu-miR-7b-002555         | -5.39   |
| mmu-miR-467a-002587       | -1.71   |
| rno-miR-224-000599        | -1.97   |
| hsa-miR-214-000517        | -1.42   |
| mmu-miR-135a-000460       | -1.43   |
| mmu-miR-340-5p-002258     | -1.39   |
| rno-miR-664-001323        | -1.63   |
| mmu-miR-18a-002422        | -1.21   |
| hsa-miR-338-5P-002658     | -4.53   |

**Table S4. List of microRNAs differentially expressed in OID daughters' mammary tissue.** miRNA that has  $\text{fdr} < 0.1$  ( $p < 0.05$ ) were considered as significantly regulated miRNAs.

| <b>Ingenuity Canonical Pathways</b>                                  | <b>-log(p value)</b> | <b>Ratio</b> | <b>Overlaps with dataset</b> |
|----------------------------------------------------------------------|----------------------|--------------|------------------------------|
| Insulin Receptor Signaling                                           | 3.04E00              | 8.05E-02     | 12/149 (8%)                  |
| Hypoxia Signaling in the Cardiovascular System                       | 2.99E00              | 1.18E-01     | 8/68 (12%)                   |
| Regulation of the Epithelial-Mesenchymal Transition Pathway          | 2.77E00              | 7.14E-02     | 14/196 (7%)                  |
| Axonal Guidance Signaling                                            | 2.59E00              | 5.13E-02     | 25/487 (5%)                  |
| Role of NANOG in Mammalian Embryonic Stem Cell Pluripotency          | 2.57E00              | 8.4E-02      | 10/119 (8%)                  |
| SAPK/JNK Signaling                                                   | 2.54E00              | 8.57E-02     | 9/105 (9%)                   |
| CDK5 Signaling                                                       | 2.2E00               | 8.25E-02     | 8/97 (8%)                    |
| April Mediated Signaling                                             | 2.2E00               | 1.14E-01     | 5/44 (11%)                   |
| ERK/MAPK Signaling                                                   | 2.2E00               | 6.16E-02     | 13/211 (6%)                  |
| Estrogen Receptor Signaling                                          | 2.18E00              | 7.35E-02     | 10/136 (7%)                  |
| PEDF Signaling                                                       | 2.17E00              | 8.86E-02     | 7/79 (9%)                    |
| Wnt/ $\beta$ -catenin Signaling                                      | 2.12E00              | 6.86E-02     | 12/175 (7%)                  |
| Basal Cell Carcinoma Signaling                                       | 2.11E00              | 8.97E-02     | 7/78 (9%)                    |
| STAT3 Pathway                                                        | 2.11E00              | 8.75E-02     | 7/80 (9%)                    |
| B Cell Activating Factor Signaling                                   | 2.1E00               | 1.09E-01     | 5/46 (11%)                   |
| Breast Cancer Regulation by Stathmin1                                | 2.1E00               | 6.07E-02     | 13/214 (6%)                  |
| Glucocorticoid Receptor Signaling                                    | 2.08E00              | 5.35E-02     | 16/299 (5%)                  |
| Ovarian Cancer Signaling                                             | 2.04E00              | 6.58E-02     | 10/152 (7%)                  |
| Mouse Embryonic Stem Cell Pluripotency                               | 2.01E00              | 8.08E-02     | 8/99 (8%)                    |
| Cardiac $\beta$ -adrenergic Signaling                                | 2E00                 | 6.33E-02     | 10/158 (6%)                  |
| PDGF Signaling                                                       | 1.99E00              | 8.14E-02     | 7/86 (8%)                    |
| T Cell Receptor Signaling                                            | 1.96E00              | 7.34E-02     | 8/109 (7%)                   |
| Molecular Mechanisms of Cancer                                       | 1.93E00              | 4.9E-02      | 19/388 (5%)                  |
| Reelin Signaling in Neurons                                          | 1.93E00              | 8.24E-02     | 7/85 (8%)                    |
| Regulation of IL-2 Expression in Activated and Anergic T Lymphocytes | 1.93E00              | 7.87E-02     | 7/89 (8%)                    |
| Cyclins and Cell Cycle Regulation                                    | 1.9E00               | 7.29E-02     | 7/96 (7%)                    |
| Sonic Hedgehog Signaling                                             | 1.87E00              | 1.14E-01     | 4/35 (11%)                   |
| Protein Ubiquitination Pathway                                       | 1.83E00              | 5.56E-02     | 15/270 (6%)                  |
| RAN Signaling                                                        | 1.83E00              | 1.25E-01     | 3/24 (13%)                   |
| Cell Cycle: G1/S Checkpoint Regulation                               | 1.77E00              | 8.33E-02     | 6/72 (8%)                    |
| Phosphatidylcholine Biosynthesis I                                   | 1.73E00              | 1.18E-01     | 2/17 (12%)                   |
| Oncostatin M Signaling                                               | 1.68E00              | 1.14E-01     | 4/35 (11%)                   |
| RhoGDI Signaling                                                     | 1.67E00              | 5.45E-02     | 11/202 (5%)                  |
| Factors Promoting Cardiogenesis in Vertebrates                       | 1.67E00              | 7.07E-02     | 7/99 (7%)                    |
| Ephrin Receptor Signaling                                            | 1.66E00              | 5.24E-02     | 11/210 (5%)                  |
| Renal Cell Carcinoma Signaling                                       | 1.65E00              | 7.59E-02     | 6/79 (8%)                    |

|                                                               |         |          |             |
|---------------------------------------------------------------|---------|----------|-------------|
| Prolactin Signaling                                           | 1.57E00 | 7.14E-02 | 6/84 (7%)   |
| B Cell Receptor Signaling                                     | 1.55E00 | 5.71E-02 | 10/175 (6%) |
| IL-4 Signaling                                                | 1.55E00 | 7.5E-02  | 6/80 (8%)   |
| Signaling by Rho Family GTPases                               | 1.52E00 | 4.94E-02 | 13/263 (5%) |
| Dopamine Receptor Signaling                                   | 1.5E00  | 6.25E-02 | 6/96 (6%)   |
| BMP signaling pathway                                         | 1.5E00  | 6.98E-02 | 6/86 (7%)   |
| Gα12/13 Signaling                                             | 1.49E00 | 6.3E-02  | 8/127 (6%)  |
| D-myo-inositol-5-phosphate Metabolism                         | 1.49E00 | 5.56E-02 | 9/162 (6%)  |
| 3-phosphoinositide Degradation                                | 1.49E00 | 5.56E-02 | 9/162 (6%)  |
| IGF-1 Signaling                                               | 1.49E00 | 6.54E-02 | 7/107 (7%)  |
| ErbB2-ErbB3 Signaling                                         | 1.49E00 | 7.94E-02 | 5/63 (8%)   |
| Netrin Signaling                                              | 1.48E00 | 6.9E-02  | 4/58 (7%)   |
| Transcriptional Regulatory Network in Embryonic Stem Cells    | 1.45E00 | 9.3E-02  | 4/43 (9%)   |
| Role of Wnt/GSK-3β Signaling in the Pathogenesis of Influenza | 1.43E00 | 7.23E-02 | 6/83 (7%)   |
| Estrogen-mediated S-phase Entry                               | 1.42E00 | 1.07E-01 | 3/28 (11%)  |
| Telomerase Signaling                                          | 1.41E00 | 6.6E-02  | 7/106 (7%)  |
| D-myo-inositol (1,4,5,6)-Tetrakisphosphate Biosynthesis       | 1.4E00  | 5.56E-02 | 8/144 (6%)  |
| D-myo-inositol (3,4,5,6)-tetrakisphosphate Biosynthesis       | 1.4E00  | 5.56E-02 | 8/144 (6%)  |
| Colorectal Cancer Metastasis Signaling                        | 1.38E00 | 4.85E-02 | 13/268 (5%) |
| Glioblastoma Multiforme Signaling                             | 1.38E00 | 5.36E-02 | 9/168 (5%)  |
| Rac Signaling                                                 | 1.35E00 | 5.47E-02 | 7/128 (5%)  |
| Antiproliferative Role of Somatostatin Receptor 2             | 1.3E00  | 6.94E-02 | 5/72 (7%)   |
| fMLP Signaling in Neutrophils                                 | 1.26E00 | 5.3E-02  | 7/132 (5%)  |
| TGF-β Signaling                                               | 1.26E00 | 6.38E-02 | 6/94 (6%)   |
| PAK Signaling                                                 | 1.24E00 | 5.45E-02 | 6/110 (5%)  |
| JAK/Stat Signaling                                            | 1.23E00 | 7.04E-02 | 5/71 (7%)   |
| Role of NFAT in Cardiac Hypertrophy                           | 1.22E00 | 4.78E-02 | 10/209 (5%) |
| Choline Biosynthesis III                                      | 1.22E00 | 9.09E-02 | 2/22 (9%)   |
| Neurotrophin/TRK Signaling                                    | 1.21E00 | 6.58E-02 | 5/76 (7%)   |
| Ephrin A Signaling                                            | 1.2E00  | 7.41E-02 | 4/54 (7%)   |
| Vitamin-C Transport                                           | 1.16E00 | 9.09E-02 | 2/22 (9%)   |
| PKCθ Signaling in T Lymphocytes                               | 1.14E00 | 4.86E-02 | 7/144 (5%)  |
| IL-6 Signaling                                                | 1.14E00 | 5.65E-02 | 7/124 (6%)  |
| Chronic Myeloid Leukemia Signaling                            | 1.13E00 | 5.66E-02 | 6/106 (6%)  |
| PTEN Signaling                                                | 1.13E00 | 5.07E-02 | 7/138 (5%)  |
| IL-17 Signaling                                               | 1.13E00 | 6.67E-02 | 5/75 (7%)   |
| LPS-stimulated MAPK Signaling                                 | 1.11E00 | 6.02E-02 | 5/83 (6%)   |
| CNTF Signaling                                                | 1.1E00  | 7.02E-02 | 4/57 (7%)   |



|                                                                                |          |          |             |
|--------------------------------------------------------------------------------|----------|----------|-------------|
| Endometrial Cancer Signaling                                                   | 1.1E00   | 6.67E-02 | 4/60 (7%)   |
| IL-2 Signaling                                                                 | 1.08E00  | 6.56E-02 | 4/61 (7%)   |
| p53 Signaling                                                                  | 1.06E00  | 5.31E-02 | 6/113 (5%)  |
| Epithelial Adherens Junction Signaling                                         | 1.05E00  | 5.19E-02 | 8/154 (5%)  |
| G $\alpha$ i Signaling                                                         | 1.05E00  | 5.19E-02 | 7/135 (5%)  |
| G Protein Signaling Mediated by Tubby                                          | 1.05E00  | 6.82E-02 | 3/44 (7%)   |
| Interferon Signaling                                                           | 1.05E00  | 8.33E-02 | 3/36 (8%)   |
| Diphthamide Biosynthesis                                                       | 1.04E00  | 7.69E-02 | 1/13 (8%)   |
| Thyronamine and Iodothyronamine Metabolism                                     | 1.04E00  | 7.69E-02 | 1/13 (8%)   |
| Thyroid Hormone Metabolism I (via Deiodination)                                | 1.04E00  | 7.69E-02 | 1/13 (8%)   |
| S-adenosyl-L-methionine Biosynthesis                                           | 1.04E00  | 1.25E-01 | 1/8 (13%)   |
| Acute Myeloid Leukemia Signaling                                               | 1.03E00  | 5.95E-02 | 5/84 (6%)   |
| HGF Signaling                                                                  | 1.03E00  | 5.41E-02 | 6/111 (5%)  |
| NF- $\kappa$ B Signaling                                                       | 1.03E00  | 4.97E-02 | 9/181 (5%)  |
| Cell Cycle Regulation by BTG Family Proteins                                   | 1.02E00  | 7.69E-02 | 3/39 (8%)   |
| Cardiac Hypertrophy Signaling                                                  | 1.01E00  | 4.4E-02  | 11/250 (4%) |
| Cholecystokinin/Gastrin-mediated Signaling                                     | 1.01E00  | 5.66E-02 | 6/106 (6%)  |
| Paxillin Signaling                                                             | 1.01E00  | 5.13E-02 | 6/117 (5%)  |
| Glutathione Redox Reactions I                                                  | 1.01E00  | 8.33E-02 | 2/24 (8%)   |
| EGF Signaling                                                                  | 1.01E00  | 6.25E-02 | 4/64 (6%)   |
| Role of Macrophages, Fibroblasts and Endothelial Cells in Rheumatoid Arthritis | 1E00     | 4.09E-02 | 14/342 (4%) |
| HIF1 $\alpha$ Signaling                                                        | 9.82E-01 | 5.36E-02 | 6/112 (5%)  |
| PPAR $\alpha$ /RXR $\alpha$ Activation                                         | 9.8E-01  | 4.5E-02  | 9/200 (5%)  |
| Sertoli Cell-Sertoli Cell Junction Signaling                                   | 9.8E-01  | 4.55E-02 | 9/198 (5%)  |
| 3-phosphoinositide Biosynthesis                                                | 9.79E-01 | 4.42E-02 | 8/181 (4%)  |
| PI3K Signaling in B Lymphocytes                                                | 9.7E-01  | 4.9E-02  | 7/143 (5%)  |
| G-Protein Coupled Receptor Signaling                                           | 9.49E-01 | 4.35E-02 | 12/276 (4%) |
| Cardiomyocyte Differentiation via BMP Receptors                                | 9.29E-01 | 9.09E-02 | 2/22 (9%)   |
| Phospholipase C Signaling                                                      | 9.27E-01 | 4.15E-02 | 11/265 (4%) |
| NGF Signaling                                                                  | 9.24E-01 | 4.92E-02 | 6/122 (5%)  |
| 1,25-dihydroxyvitamin D3 Biosynthesis                                          | 9.23E-01 | 9.09E-02 | 1/11 (9%)   |
| IL-15 Signaling                                                                | 9.08E-01 | 5.56E-02 | 4/72 (6%)   |
| Renin-Angiotensin Signaling                                                    | 8.96E-01 | 4.76E-02 | 6/126 (5%)  |
| TR/RXR Activation                                                              | 8.94E-01 | 4.59E-02 | 5/109 (5%)  |
| ErbB Signaling                                                                 | 8.94E-01 | 5.56E-02 | 5/90 (6%)   |

|                                                            |          |          |             |
|------------------------------------------------------------|----------|----------|-------------|
| Role of JAK1 and JAK3 in $\gamma$ Cytokine Signaling       | 8.89E-01 | 5.88E-02 | 4/68 (6%)   |
| Thyroid Cancer Signaling                                   | 8.89E-01 | 6.82E-02 | 3/44 (7%)   |
| Human Embryonic Stem Cell Pluripotency                     | 8.81E-01 | 4.32E-02 | 7/162 (4%)  |
| Estrogen-Dependent Breast Cancer Signaling                 | 8.71E-01 | 5.48E-02 | 4/73 (5%)   |
| GM-CSF Signaling                                           | 8.71E-01 | 5.88E-02 | 4/68 (6%)   |
| Actin Cytoskeleton Signaling                               | 8.68E-01 | 4.13E-02 | 10/242 (4%) |
| Fc $\gamma$ RIIB Signaling in B Lymphocytes                | 8.66E-01 | 4.69E-02 | 3/64 (5%)   |
| $\alpha$ -Adrenergic Signaling                             | 8.49E-01 | 4.59E-02 | 5/109 (5%)  |
| Superpathway of Inositol Phosphate Compounds               | 8.45E-01 | 3.85E-02 | 9/234 (4%)  |
| Melanoma Signaling                                         | 8.43E-01 | 6E-02    | 3/50 (6%)   |
| UVC-Induced MAPK Signaling                                 | 8.43E-01 | 6.82E-02 | 3/44 (7%)   |
| Non-Small Cell Lung Cancer Signaling                       | 8.36E-01 | 4.82E-02 | 4/83 (5%)   |
| Protein Citrullination                                     | 8.33E-01 | 1.67E-01 | 1/6 (17%)   |
| Galactose Degradation I (Leloir Pathway)                   | 8.33E-01 | 6.25E-02 | 1/16 (6%)   |
| UVA-Induced MAPK Signaling                                 | 8.06E-01 | 5.1E-02  | 5/98 (5%)   |
| 14-3-3-mediated Signaling                                  | 7.94E-01 | 4.96E-02 | 6/121 (5%)  |
| Maturity Onset Diabetes of Young (MODY) Signaling          | 7.93E-01 | 6.06E-02 | 2/33 (6%)   |
| VEGF Signaling                                             | 7.92E-01 | 4.59E-02 | 5/109 (5%)  |
| GDNF Family Ligand-Receptor Interactions                   | 7.86E-01 | 5.26E-02 | 4/76 (5%)   |
| RhoA Signaling                                             | 7.82E-01 | 4.88E-02 | 6/123 (5%)  |
| p38 MAPK Signaling                                         | 7.82E-01 | 5E-02    | 6/120 (5%)  |
| Integrin Signaling                                         | 7.8E-01  | 4.33E-02 | 9/208 (4%)  |
| Growth Hormone Signaling                                   | 7.7E-01  | 5.13E-02 | 4/78 (5%)   |
| IL-22 Signaling                                            | 7.64E-01 | 8E-02    | 2/25 (8%)   |
| Glycine Cleavage Complex                                   | 7.6E-01  | 6.67E-02 | 1/15 (7%)   |
| Selenocysteine Biosynthesis II (Archaea and Eukaryotes)    | 7.6E-01  | 5.88E-02 | 1/17 (6%)   |
| Glioma Signaling                                           | 7.52E-01 | 4.42E-02 | 5/113 (4%)  |
| IL-3 Signaling                                             | 7.39E-01 | 5.33E-02 | 4/75 (5%)   |
| Small Cell Lung Cancer Signaling                           | 7.39E-01 | 4.26E-02 | 4/94 (4%)   |
| G $\alpha$ q Signaling                                     | 7.39E-01 | 4.09E-02 | 7/171 (4%)  |
| Role of JAK family kinases in IL-6-type Cytokine Signaling | 7.36E-01 | 7.14E-02 | 2/28 (7%)   |
| Bupropion Degradation                                      | 7.1E-01  | 6.06E-02 | 2/33 (6%)   |
| CXCR4 Signaling                                            | 6.9E-01  | 4.02E-02 | 7/174 (4%)  |
| Acetone Degradation I (to Methylglyoxal)                   | 6.85E-01 | 5.56E-02 | 2/36 (6%)   |
| FLT3 Signaling in Hematopoietic Progenitor Cells           | 6.82E-01 | 5.06E-02 | 4/79 (5%)   |

|                                                                           |          |          |             |
|---------------------------------------------------------------------------|----------|----------|-------------|
| Amyloid Processing                                                        | 6.7E-01  | 4.92E-02 | 3/61 (5%)   |
| Protein Kinase A Signaling                                                | 6.59E-01 | 3.67E-02 | 15/409 (4%) |
| Glycoaminoglycan-protein Linkage Region Biosynthesis                      | 6.48E-01 | 6.25E-02 | 1/16 (6%)   |
| eNOS Signaling                                                            | 6.42E-01 | 3.87E-02 | 6/155 (4%)  |
| Ceramide Signaling                                                        | 6.17E-01 | 4.4E-02  | 4/91 (4%)   |
| Role of p14/p19ARF in Tumor Suppression                                   | 6.17E-01 | 5.71E-02 | 2/35 (6%)   |
| Pancreatic Adenocarcinoma Signaling                                       | 6.13E-01 | 3.91E-02 | 5/128 (4%)  |
| Thrombopoietin Signaling                                                  | 6.07E-01 | 4.69E-02 | 3/64 (5%)   |
| Role of CHK Proteins in Cell Cycle Checkpoint Control                     | 6.07E-01 | 5.08E-02 | 3/59 (5%)   |
| AMPK Signaling                                                            | 6.05E-01 | 3.31E-02 | 6/181 (3%)  |
| Prostanoid Biosynthesis                                                   | 6.04E-01 | 6.67E-02 | 1/15 (7%)   |
| Thrombin Signaling                                                        | 6.02E-01 | 3.79E-02 | 8/211 (4%)  |
| mTOR Signaling                                                            | 6.02E-01 | 3.76E-02 | 8/213 (4%)  |
| Role of Osteoblasts, Osteoclasts and Chondrocytes in Rheumatoid Arthritis | 5.97E-01 | 3.6E-02  | 9/250 (4%)  |
| Toll-like Receptor Signaling                                              | 5.93E-01 | 4.69E-02 | 3/64 (5%)   |
| Fc Epsilon RI Signaling                                                   | 5.92E-01 | 4.27E-02 | 5/117 (4%)  |
| Prostate Cancer Signaling                                                 | 5.82E-01 | 3.88E-02 | 4/103 (4%)  |
| Huntington's Disease Signaling                                            | 5.76E-01 | 3.57E-02 | 9/252 (4%)  |
| Embryonic Stem Cell Differentiation into Cardiac Lineages                 | 5.65E-01 | 1E-01    | 1/10 (10%)  |
| Calcium Transport I                                                       | 5.65E-01 | 7.14E-02 | 1/14 (7%)   |
| Myc Mediated Apoptosis Signaling                                          | 5.65E-01 | 4.76E-02 | 3/63 (5%)   |
| Death Receptor Signaling                                                  | 5.65E-01 | 4.41E-02 | 3/68 (4%)   |
| Glutamate Receptor Signaling                                              | 5.51E-01 | 4.17E-02 | 3/72 (4%)   |
| Circadian Rhythm Signaling                                                | 5.4E-01  | 5.26E-02 | 2/38 (5%)   |
| Role of NFAT in Regulation of the Immune Response                         | 5.39E-01 | 3.5E-02  | 7/200 (4%)  |
| Role of BRCA1 in DNA Damage Response                                      | 5.38E-01 | 4.23E-02 | 3/71 (4%)   |
| Apoptosis Signaling                                                       | 5.27E-01 | 4E-02    | 4/100 (4%)  |
| Type II Diabetes Mellitus Signaling                                       | 5.26E-01 | 2.92E-02 | 5/171 (3%)  |
| Hereditary Breast Cancer Signaling                                        | 5.26E-01 | 3.73E-02 | 5/134 (4%)  |
| tRNA Splicing                                                             | 5.23E-01 | 4.35E-02 | 2/46 (4%)   |
| Bladder Cancer Signaling                                                  | 5.17E-01 | 4.12E-02 | 4/97 (4%)   |
| G Beta Gamma Signaling                                                    | 5.17E-01 | 3.31E-02 | 4/121 (3%)  |
| CD40 Signaling                                                            | 5.01E-01 | 4.23E-02 | 3/71 (4%)   |
| Cleavage and Polyadenylation of Pre-mRNA                                  | 4.99E-01 | 7.69E-02 | 1/13 (8%)   |
| Synaptic Long Term Potentiation                                           | 4.91E-01 | 3.85E-02 | 5/130 (4%)  |
| ERK5 Signaling                                                            | 4.89E-01 | 4.41E-02 | 3/68 (4%)   |
| IL-17A Signaling in Airway Cells                                          | 4.89E-01 | 3.95E-02 | 3/76 (4%)   |

|                                                            |          |          |            |
|------------------------------------------------------------|----------|----------|------------|
| HMGB1 Signaling                                            | 4.78E-01 | 3.67E-02 | 4/109 (4%) |
| NRF2-mediated Oxidative Stress Response                    | 4.76E-01 | 3.59E-02 | 7/195 (4%) |
| Calcium Signaling                                          | 4.76E-01 | 3.23E-02 | 7/217 (3%) |
| Estrogen Biosynthesis                                      | 4.75E-01 | 4.08E-02 | 2/49 (4%)  |
| Assembly of RNA Polymerase III Complex                     | 4.7E-01  | 6.25E-02 | 1/16 (6%)  |
| Cholesterol Biosynthesis I                                 | 4.7E-01  | 2.5E-02  | 1/40 (3%)  |
| Cholesterol Biosynthesis II (via 24,25-dihydrolanosterol)  | 4.7E-01  | 2.5E-02  | 1/40 (3%)  |
| Cholesterol Biosynthesis III (via Desmosterol)             | 4.7E-01  | 2.5E-02  | 1/40 (3%)  |
| PPAR Signaling                                             | 4.69E-01 | 3.74E-02 | 4/107 (4%) |
| PI3K/AKT Signaling                                         | 4.67E-01 | 3.29E-02 | 5/152 (3%) |
| PXR/RXR Activation                                         | 4.56E-01 | 3.26E-02 | 3/92 (3%)  |
| Erythropoietin Signaling                                   | 4.56E-01 | 3.8E-02  | 3/79 (4%)  |
| Retinoic acid Mediated Apoptosis Signaling                 | 4.56E-01 | 4.11E-02 | 3/73 (4%)  |
| EIF2 Signaling                                             | 4.51E-01 | 3.48E-02 | 7/201 (3%) |
| Role of PKR in Interferon Induction and Antiviral Response | 4.47E-01 | 4.08E-02 | 2/49 (4%)  |
| Neuroprotective Role of THOP1 in Alzheimer's Disease       | 4.47E-01 | 3.64E-02 | 2/55 (4%)  |
| IL-10 Signaling                                            | 4.45E-01 | 3.85E-02 | 3/78 (4%)  |
| Agrin Interactions at Neuromuscular Junction               | 4.45E-01 | 4.29E-02 | 3/70 (4%)  |
| Role of MAPK Signaling in the Pathogenesis of Influenza    | 4.45E-01 | 4.17E-02 | 3/72 (4%)  |
| Macropinocytosis Signaling                                 | 4.45E-01 | 3.9E-02  | 3/77 (4%)  |
| Colanic Acid Building Blocks Biosynthesis                  | 4.44E-01 | 2.78E-02 | 1/36 (3%)  |
| Melatonin Signaling                                        | 4.25E-01 | 3.7E-02  | 3/81 (4%)  |
| Cellular Effects of Sildenafil (Viagra)                    | 4.22E-01 | 3.23E-02 | 5/155 (3%) |
| Telomere Extension by Telomerase                           | 4.21E-01 | 5.56E-02 | 1/18 (6%)  |
| CDP-diacylglycerol Biosynthesis I                          | 4.21E-01 | 3.7E-02  | 1/27 (4%)  |
| $\gamma$ -glutamyl Cycle                                   | 4.21E-01 | 3.57E-02 | 1/28 (4%)  |
| GNRH Signaling                                             | 4.15E-01 | 3.27E-02 | 5/153 (3%) |
| Nitric Oxide Signaling in the Cardiovascular System        | 4.1E-01  | 3.2E-02  | 4/125 (3%) |
| Methionine Degradation I (to Homocysteine)                 | 3.99E-01 | 4.17E-02 | 1/24 (4%)  |
| Dopamine-DARPP32 Feedback in cAMP Signaling                | 3.96E-01 | 3.21E-02 | 6/187 (3%) |
| iNOS Signaling                                             | 3.95E-01 | 3.77E-02 | 2/53 (4%)  |
| Ephrin B Signaling                                         | 3.88E-01 | 3.66E-02 | 3/82 (4%)  |
| Phosphatidylglycerol Biosynthesis II (Non-plastidic)       | 3.79E-01 | 3.03E-02 | 1/33 (3%)  |
| Leptin Signaling in Obesity                                | 3.79E-01 | 3.53E-02 | 3/85 (4%)  |

|                                                                       |          |          |            |
|-----------------------------------------------------------------------|----------|----------|------------|
| HER-2 Signaling in Breast Cancer                                      | 3.7E-01  | 3.66E-02 | 3/82 (4%)  |
| VEGF Family Ligand-Receptor Interactions                              | 3.7E-01  | 3.41E-02 | 3/88 (3%)  |
| Relaxin Signaling                                                     | 3.68E-01 | 3.05E-02 | 5/164 (3%) |
| iCOS-iCOSL Signaling in T Helper Cells                                | 3.65E-01 | 3.17E-02 | 4/126 (3%) |
| Acute Phase Response Signaling                                        | 3.61E-01 | 3.31E-02 | 6/181 (3%) |
| D-myo-inositol (1,4,5)-trisphosphate Degradation                      | 3.61E-01 | 4.35E-02 | 1/23 (4%)  |
| Cysteine Biosynthesis III (mammalia)                                  | 3.61E-01 | 3.23E-02 | 1/31 (3%)  |
| Endoplasmic Reticulum Stress Pathway                                  | 3.61E-01 | 5.26E-02 | 1/19 (5%)  |
| Type I Diabetes Mellitus Signaling                                    | 3.58E-01 | 3.31E-02 | 4/121 (3%) |
| Hepatic Cholestasis                                                   | 3.56E-01 | 2.73E-02 | 5/183 (3%) |
| Natural Killer Cell Signaling                                         | 3.44E-01 | 3.39E-02 | 4/118 (3%) |
| Granzyme A Signaling                                                  | 3.43E-01 | 5E-02    | 1/20 (5%)  |
| Role of Tissue Factor in Cancer                                       | 3.38E-01 | 3.08E-02 | 4/130 (3%) |
| DNA Methylation and Transcriptional Repression Signaling              | 3.27E-01 | 4.35E-02 | 1/23 (4%)  |
| Nicotine Degradation III                                              | 3.12E-01 | 2.74E-02 | 2/73 (3%)  |
| Production of Nitric Oxide and Reactive Oxygen Species in Macrophages | 3.09E-01 | 2.83E-02 | 6/212 (3%) |
| Regulation of eIF4 and p70S6K Signaling                               | 3.05E-01 | 2.86E-02 | 5/175 (3%) |
| UVB-Induced MAPK Signaling                                            | 3.03E-01 | 3.45E-02 | 2/58 (3%)  |
| Polyamine Regulation in Colon Cancer                                  | 2.98E-01 | 3.33E-02 | 1/30 (3%)  |
| Lymphotoxin $\beta$ Receptor Signaling                                | 2.95E-01 | 3.23E-02 | 2/62 (3%)  |
| Melanocyte Development and Pigmentation Signaling                     | 2.95E-01 | 3.16E-02 | 3/95 (3%)  |
| RANK Signaling in Osteoclasts                                         | 2.88E-01 | 3.09E-02 | 3/97 (3%)  |
| Melatonin Degradation I                                               | 2.86E-01 | 3.03E-02 | 2/66 (3%)  |
| p70S6K Signaling                                                      | 2.84E-01 | 3.03E-02 | 4/132 (3%) |
| Neuregulin Signaling                                                  | 2.82E-01 | 2.88E-02 | 3/104 (3%) |
| CTLA4 Signaling in Cytotoxic T Lymphocytes                            | 2.82E-01 | 3.12E-02 | 3/96 (3%)  |
| Aldosterone Signaling in Epithelial Cells                             | 2.8E-01  | 2.96E-02 | 5/169 (3%) |
| Actin Nucleation by ARP-WASP Complex                                  | 2.78E-01 | 2.99E-02 | 2/67 (3%)  |
| Virus Entry via Endocytic Pathways                                    | 2.75E-01 | 2.97E-02 | 3/101 (3%) |
| IL-8 Signaling                                                        | 2.73E-01 | 2.67E-02 | 6/225 (3%) |
| ILK Signaling                                                         | 2.73E-01 | 2.93E-02 | 6/205 (3%) |
| P2Y Purigenic Receptor Signaling Pathway                              | 2.73E-01 | 2.78E-02 | 4/144 (3%) |
| Role of JAK1, JAK2 and TYK2 in Interferon Signaling                   | 2.72E-01 | 3.57E-02 | 1/28 (4%)  |

|                                                                 |          |          |            |
|-----------------------------------------------------------------|----------|----------|------------|
| Pyrimidine Deoxyribonucleotides De Novo Biosynthesis I          | 2.72E-01 | 2.27E-02 | 1/44 (2%)  |
| Superpathway of D-myo-inositol (1,4,5)-trisphosphate Metabolism | 2.72E-01 | 3.03E-02 | 1/33 (3%)  |
| cAMP-mediated signaling                                         | 2.71E-01 | 3.1E-02  | 7/226 (3%) |
| Dermatan Sulfate Biosynthesis                                   | 2.7E-01  | 2.74E-02 | 2/73 (3%)  |
| Regulation of Cellular Mechanics by Calpain Protease            | 2.7E-01  | 2.74E-02 | 2/73 (3%)  |
| Germ Cell-Sertoli Cell Junction Signaling                       | 2.66E-01 | 2.96E-02 | 5/169 (3%) |
| Gap Junction Signaling                                          | 2.66E-01 | 2.76E-02 | 5/181 (3%) |
| Glioma Invasiveness Signaling                                   | 2.63E-01 | 3.03E-02 | 2/66 (3%)  |
| Heparan Sulfate Biosynthesis                                    | 2.63E-01 | 2.67E-02 | 2/75 (3%)  |
| IL-17A Signaling in Gastric Cells                               | 2.61E-01 | 3.57E-02 | 1/28 (4%)  |
| Induction of Apoptosis by HIV1                                  | 2.56E-01 | 2.99E-02 | 2/67 (3%)  |
| IL-1 Signaling                                                  | 2.52E-01 | 2.75E-02 | 3/109 (3%) |
| Lipid Antigen Presentation by CD1                               | 2.5E-01  | 3.33E-02 | 1/30 (3%)  |
| ErbB4 Signaling                                                 | 2.48E-01 | 2.9E-02  | 2/69 (3%)  |
| Superpathway of Melatonin Degradation                           | 2.48E-01 | 2.47E-02 | 2/81 (2%)  |
| Nicotine Degradation II                                         | 2.42E-01 | 2.35E-02 | 2/85 (2%)  |
| IL-15 Production                                                | 2.39E-01 | 3.23E-02 | 1/31 (3%)  |
| TNFR2 Signaling                                                 | 2.29E-01 | 2.94E-02 | 1/34 (3%)  |
| Glutathione-mediated Detoxification                             | 2.29E-01 | 2.27E-02 | 1/44 (2%)  |
| Pyrimidine Ribonucleotides Interconversion                      | 2.29E-01 | 2.5E-02  | 1/40 (3%)  |
| Activation of IRF by Cytosolic Pattern Recognition Receptors    | 2.28E-01 | 2.7E-02  | 2/74 (3%)  |
| Eicosanoid Signaling                                            | 2.28E-01 | 2.33E-02 | 2/86 (2%)  |
| Pyrimidine Ribonucleotides De Novo Biosynthesis                 | 2.11E-01 | 1.85E-02 | 1/54 (2%)  |
| Superpathway of Cholesterol Biosynthesis                        | 2.11E-01 | 1.15E-02 | 1/87 (1%)  |
| 4-1BB Signaling in T Lymphocytes                                | 2.03E-01 | 2.78E-02 | 1/36 (3%)  |
| Superpathway of Methionine Degradation                          | 2.03E-01 | 1.54E-02 | 1/65 (2%)  |

**Table S5. Signaling pathways regulated by the microRNAs differentially expressed in OID fathers and their daughters.** Ingenuity Canonical Pathways regulated by mmu-miRNAs 296-5p, 874 and 1896.

| <b>Ingenuity Canonical Pathways</b>                                 | <b>-log(p-value)</b> | <b>Ratio</b> | <b>Overlaps with dataset</b> |
|---------------------------------------------------------------------|----------------------|--------------|------------------------------|
| Role of NANOG in Mammalian Embryonic Stem Cell Pluripotency         | 2E00                 | 2.73E-02     | 3/110 (3%)                   |
| Thyroid Cancer Signaling                                            | 1.95E00              | 5E-02        | 2/40 (5%)                    |
| S-adenosyl-L-methionine Biosynthesis                                | 1.92E00              | 3.33E-01     | 1/3 (33%)                    |
| Melanoma Signaling                                                  | 1.91E00              | 4.76E-02     | 2/42 (5%)                    |
| Molecular Mechanisms of Cancer                                      | 1.81E00              | 1.38E-02     | 5/363 (1%)                   |
| Ovarian Cancer Signaling                                            | 1.8E00               | 2.29E-02     | 3/131 (2%)                   |
| CD27 Signaling in Lymphocytes                                       | 1.73E00              | 3.85E-02     | 2/52 (4%)                    |
| Galactose Degradation I (Leloir Pathway)                            | 1.7E00               | 2E-01        | 1/5 (20%)                    |
| Lymphotoxin $\beta$ Receptor Signaling                              | 1.7E00               | 3.7E-02      | 2/54 (4%)                    |
| Glioblastoma Multiforme Signaling                                   | 1.67E00              | 2.05E-02     | 3/146 (2%)                   |
| Regulation of Cellular Mechanics by Calpain Protease                | 1.65E00              | 3.51E-02     | 2/57 (4%)                    |
| Myc Mediated Apoptosis Signaling                                    | 1.64E00              | 3.45E-02     | 2/58 (3%)                    |
| Non-Small Cell Lung Cancer Signaling                                | 1.55E00              | 3.08E-02     | 2/65 (3%)                    |
| Small Cell Lung Cancer Signaling                                    | 1.48E00              | 2.82E-02     | 2/71 (3%)                    |
| IL-17 Signaling                                                     | 1.47E00              | 2.78E-02     | 2/72 (3%)                    |
| Basal Cell Carcinoma Signaling                                      | 1.47E00              | 2.78E-02     | 2/72 (3%)                    |
| BMP signaling pathway                                               | 1.43E00              | 2.67E-02     | 2/75 (3%)                    |
| Ceramide Signaling                                                  | 1.38E00              | 2.5E-02      | 2/80 (3%)                    |
| Bladder Cancer Signaling                                            | 1.32E00              | 2.3E-02      | 2/87 (2%)                    |
| TGF- $\beta$ Signaling                                              | 1.32E00              | 2.3E-02      | 2/87 (2%)                    |
| G Beta Gamma Signaling                                              | 1.31E00              | 2.27E-02     | 2/88 (2%)                    |
| PAK Signaling                                                       | 1.31E00              | 2.27E-02     | 2/88 (2%)                    |
| UVA-Induced MAPK Signaling                                          | 1.31E00              | 2.27E-02     | 2/88 (2%)                    |
| Apoptosis Signaling                                                 | 1.3E00               | 2.25E-02     | 2/89 (2%)                    |
| Role of IL-17A in Psoriasis                                         | 1.29E00              | 7.69E-02     | 1/13 (8%)                    |
| Chronic Myeloid Leukemia Signaling                                  | 1.28E00              | 2.17E-02     | 2/92 (2%)                    |
| Colanic Acid Building Blocks Biosynthesis                           | 1.26E00              | 7.14E-02     | 1/14 (7%)                    |
| SAPK/JNK Signaling                                                  | 1.26E00              | 2.13E-02     | 2/94 (2%)                    |
| T Cell Receptor Signaling                                           | 1.23E00              | 2.06E-02     | 2/97 (2%)                    |
| p53 Signaling                                                       | 1.23E00              | 2.04E-02     | 2/98 (2%)                    |
| Glioma Signaling                                                    | 1.23E00              | 2.04E-02     | 2/98 (2%)                    |
| Cardiac Hypertrophy Signaling                                       | 1.21E00              | 1.35E-02     | 3/223 (1%)                   |
| Granzyme B Signaling                                                | 1.2E00               | 6.25E-02     | 1/16 (6%)                    |
| Methionine Degradation I (to Homocysteine)                          | 1.2E00               | 6.25E-02     | 1/16 (6%)                    |
| Parkinson's Signaling                                               | 1.2E00               | 6.25E-02     | 1/16 (6%)                    |
| HGF Signaling                                                       | 1.17E00              | 1.9E-02      | 2/105 (2%)                   |
| NGF Signaling                                                       | 1.16E00              | 1.87E-02     | 2/107 (2%)                   |
| Differential Regulation of Cytokine Production in Macrophages and T | 1.15E00              | 5.56E-02     | 1/18 (6%)                    |

|                                                                                                    |          |          |            |
|----------------------------------------------------------------------------------------------------|----------|----------|------------|
| Helper Cells by IL-17A and IL-17F                                                                  |          |          |            |
| Valine Degradation I                                                                               | 1.15E00  | 5.56E-02 | 1/18 (6%)  |
| Cysteine Biosynthesis III (mammalia)                                                               | 1.15E00  | 5.56E-02 | 1/18 (6%)  |
| Oxidative Phosphorylation                                                                          | 1.15E00  | 1.85E-02 | 2/108 (2%) |
| Role of Tissue Factor in Cancer                                                                    | 1.14E00  | 1.82E-02 | 2/110 (2%) |
| Cardiomyocyte Differentiation via BMP Receptors                                                    | 1.13E00  | 5.26E-02 | 1/19 (5%)  |
| GADD45 Signaling                                                                                   | 1.13E00  | 5.26E-02 | 1/19 (5%)  |
| PKC $\theta$ Signaling in T Lymphocytes                                                            | 1.1E00   | 1.72E-02 | 2/116 (2%) |
| G $\alpha$ 12/13 Signaling                                                                         | 1.09E00  | 1.71E-02 | 2/117 (2%) |
| G $\alpha$ i Signaling                                                                             | 1.07E00  | 1.67E-02 | 2/120 (2%) |
| Differential Regulation of Cytokine Production in Intestinal Epithelial Cells by IL-17A and IL-17F | 1.05E00  | 4.35E-02 | 1/23 (4%)  |
| Tumoricidal Function of Hepatic Natural Killer Cells                                               | 1.03E00  | 4.17E-02 | 1/24 (4%)  |
| Estrogen-mediated S-phase Entry                                                                    | 1.03E00  | 4.17E-02 | 1/24 (4%)  |
| GNRH Signaling                                                                                     | 1.03E00  | 1.56E-02 | 2/128 (2%) |
| Hereditary Breast Cancer Signaling                                                                 | 1.03E00  | 1.56E-02 | 2/128 (2%) |
| Xenobiotic Metabolism Signaling                                                                    | 1.02E00  | 1.12E-02 | 3/269 (1%) |
| IL-17A Signaling in Gastric Cells                                                                  | 1.02E00  | 4E-02    | 1/25 (4%)  |
| Axonal Guidance Signaling                                                                          | 1.01E00  | 9.24E-03 | 4/433 (1%) |
| Human Embryonic Stem Cell Pluripotency                                                             | 9.99E-01 | 1.5E-02  | 2/133 (2%) |
| Cell Cycle Control of Chromosomal Replication                                                      | 9.86E-01 | 3.7E-02  | 1/27 (4%)  |
| Superpathway of Methionine Degradation                                                             | 9.3E-01  | 3.23E-02 | 1/31 (3%)  |
| Cytotoxic T Lymphocyte-mediated Apoptosis of Target Cells                                          | 9.17E-01 | 3.12E-02 | 1/32 (3%)  |
| CXCR4 Signaling                                                                                    | 9.08E-01 | 1.32E-02 | 2/151 (1%) |
| Circadian Rhythm Signaling                                                                         | 9.04E-01 | 3.03E-02 | 1/33 (3%)  |
| Retinoate Biosynthesis I                                                                           | 9.04E-01 | 3.03E-02 | 1/33 (3%)  |
| Oncostatin M Signaling                                                                             | 8.92E-01 | 2.94E-02 | 1/34 (3%)  |
| TWEAK Signaling                                                                                    | 8.92E-01 | 2.94E-02 | 1/34 (3%)  |
| Cell Cycle Regulation by BTG Family Proteins                                                       | 8.8E-01  | 2.86E-02 | 1/35 (3%)  |
| Germ Cell-Sertoli Cell Junction Signaling                                                          | 8.71E-01 | 1.26E-02 | 2/159 (1%) |
| Docosahexaenoic Acid (DHA) Signaling                                                               | 8.37E-01 | 2.56E-02 | 1/39 (3%)  |
| Acute Phase Response Signaling                                                                     | 8.29E-01 | 1.18E-02 | 2/169 (1%) |
| Mitochondrial Dysfunction                                                                          | 8.29E-01 | 1.18E-02 | 2/169 (1%) |
| Role of PKR in Interferon Induction and Antiviral Response                                         | 8.26E-01 | 2.5E-02  | 1/40 (3%)  |
| Neuroprotective Role of THO1 in Alzheimer's Disease                                                | 8.26E-01 | 2.5E-02  | 1/40 (3%)  |
| NF- $\kappa$ B Signaling                                                                           | 8.21E-01 | 1.17E-02 | 2/171 (1%) |
| Fc $\gamma$ RIIB Signaling in B Lymphocytes                                                        | 8.17E-01 | 2.44E-02 | 1/41 (2%)  |
| B Cell Receptor Signaling                                                                          | 8.09E-01 | 1.15E-02 | 2/174 (1%) |
| UVC-Induced MAPK Signaling                                                                         | 8.07E-01 | 2.38E-02 | 1/42 (2%)  |



|                                                                           |          |          |            |
|---------------------------------------------------------------------------|----------|----------|------------|
| Sertoli Cell-Sertoli Cell Junction Signaling                              | 7.93E-01 | 1.12E-02 | 2/178 (1%) |
| Role of IL-17F in Allergic Inflammatory Airway Diseases                   | 7.88E-01 | 2.27E-02 | 1/44 (2%)  |
| IL-8 Signaling                                                            | 7.75E-01 | 1.09E-02 | 2/183 (1%) |
| Regulation of the Epithelial-Mesenchymal Transition Pathway               | 7.71E-01 | 1.09E-02 | 2/184 (1%) |
| Hematopoiesis from Pluripotent Stem Cells                                 | 7.62E-01 | 2.13E-02 | 1/47 (2%)  |
| Primary Immunodeficiency Signaling                                        | 7.54E-01 | 2.08E-02 | 1/48 (2%)  |
| TNFR1 Signaling                                                           | 7.54E-01 | 2.08E-02 | 1/48 (2%)  |
| Thrombin Signaling                                                        | 7.53E-01 | 1.06E-02 | 2/189 (1%) |
| CNTF Signaling                                                            | 7.23E-01 | 1.92E-02 | 1/52 (2%)  |
| Endometrial Cancer Signaling                                              | 7.23E-01 | 1.92E-02 | 1/52 (2%)  |
| IL-2 Signaling                                                            | 7.15E-01 | 1.89E-02 | 1/53 (2%)  |
| Nur77 Signaling in T Lymphocytes                                          | 7.08E-01 | 1.85E-02 | 1/54 (2%)  |
| Role of IL-17A in Arthritis                                               | 7.08E-01 | 1.85E-02 | 1/54 (2%)  |
| Thrombopoietin Signaling                                                  | 7.01E-01 | 1.82E-02 | 1/55 (2%)  |
| Integrin Signaling                                                        | 6.99E-01 | 9.76E-03 | 2/205 (1%) |
| Actin Nucleation by ARP-WASP Complex                                      | 6.94E-01 | 1.79E-02 | 1/56 (2%)  |
| Glioma Invasiveness Signaling                                             | 6.87E-01 | 1.75E-02 | 1/57 (2%)  |
| ErbB2-ErbB3 Signaling                                                     | 6.87E-01 | 1.75E-02 | 1/57 (2%)  |
| Actin Cytoskeleton Signaling                                              | 6.72E-01 | 9.35E-03 | 2/214 (1%) |
| Induction of Apoptosis by HIV1                                            | 6.67E-01 | 1.67E-02 | 1/60 (2%)  |
| ErbB4 Signaling                                                           | 6.67E-01 | 1.67E-02 | 1/60 (2%)  |
| Retinoic acid Mediated Apoptosis Signaling                                | 6.61E-01 | 1.64E-02 | 1/61 (2%)  |
| Role of Osteoblasts, Osteoclasts and Chondrocytes in Rheumatoid Arthritis | 6.6E-01  | 9.17E-03 | 2/218 (1%) |
| cAMP-mediated signaling                                                   | 6.57E-01 | 9.13E-03 | 2/219 (1%) |
| Role of JAK1 and JAK3 in $\gamma$ c Cytokine Signaling                    | 6.55E-01 | 1.61E-02 | 1/62 (2%)  |
| GM-CSF Signaling                                                          | 6.55E-01 | 1.61E-02 | 1/62 (2%)  |
| IL-15 Signaling                                                           | 6.48E-01 | 1.59E-02 | 1/63 (2%)  |
| Antiproliferative Role of Somatostatin Receptor 2                         | 6.48E-01 | 1.59E-02 | 1/63 (2%)  |
| ERK5 Signaling                                                            | 6.48E-01 | 1.59E-02 | 1/63 (2%)  |
| Estrogen-Dependent Breast Cancer Signaling                                | 6.48E-01 | 1.59E-02 | 1/63 (2%)  |
| Pyridoxal 5'-phosphate Salvage Pathway                                    | 6.48E-01 | 1.59E-02 | 1/63 (2%)  |
| PCP pathway                                                               | 6.48E-01 | 1.59E-02 | 1/63 (2%)  |
| Cell Cycle: G1/S Checkpoint Regulation                                    | 6.48E-01 | 1.59E-02 | 1/63 (2%)  |
| IL-17A Signaling in Airway Cells                                          | 6.42E-01 | 1.56E-02 | 1/64 (2%)  |
| Angiopoietin Signaling                                                    | 6.37E-01 | 1.54E-02 | 1/65 (2%)  |
| Hypoxia Signaling in the Cardiovascular System                            | 6.37E-01 | 1.54E-02 | 1/65 (2%)  |
| Erythropoietin Signaling                                                  | 6.25E-01 | 1.49E-02 | 1/67 (1%)  |

|                                                                                 |          |          |            |
|---------------------------------------------------------------------------------|----------|----------|------------|
| Neurotrophin/TRK Signaling                                                      | 6.25E-01 | 1.49E-02 | 1/67 (1%)  |
| Agrin Interactions at Neuromuscular Junction                                    | 6.19E-01 | 1.47E-02 | 1/68 (1%)  |
| Role of MAPK Signaling in the Pathogenesis of Influenza                         | 6.19E-01 | 1.47E-02 | 1/68 (1%)  |
| GDNF Family Ligand-Receptor Interactions                                        | 6.19E-01 | 1.47E-02 | 1/68 (1%)  |
| Macropinocytosis Signaling                                                      | 6.19E-01 | 1.47E-02 | 1/68 (1%)  |
| Phospholipase C Signaling                                                       | 6.12E-01 | 8.51E-03 | 2/235 (1%) |
| Colorectal Cancer Metastasis Signaling                                          | 6.1E-01  | 8.47E-03 | 2/236 (1%) |
| Renal Cell Carcinoma Signaling                                                  | 6.08E-01 | 1.43E-02 | 1/70 (1%)  |
| Chemokine Signaling                                                             | 6.08E-01 | 1.43E-02 | 1/70 (1%)  |
| IL-3 Signaling                                                                  | 6.03E-01 | 1.41E-02 | 1/71 (1%)  |
| PEDF Signaling                                                                  | 6.03E-01 | 1.41E-02 | 1/71 (1%)  |
| GPCR-Mediated Integration of Enteroendocrine Signaling Exemplified by an L Cell | 6.03E-01 | 1.41E-02 | 1/71 (1%)  |
| JAK/Stat Signaling                                                              | 5.98E-01 | 1.39E-02 | 1/72 (1%)  |
| LPS-stimulated MAPK Signaling                                                   | 5.93E-01 | 1.37E-02 | 1/73 (1%)  |
| NF- $\kappa$ B Activation by Viruses                                            | 5.93E-01 | 1.37E-02 | 1/73 (1%)  |
| Prolactin Signaling                                                             | 5.93E-01 | 1.37E-02 | 1/73 (1%)  |
| STAT3 Pathway                                                                   | 5.93E-01 | 1.37E-02 | 1/73 (1%)  |
| IL-4 Signaling                                                                  | 5.93E-01 | 1.37E-02 | 1/73 (1%)  |
| FLT3 Signaling in Hematopoietic Progenitor Cells                                | 5.88E-01 | 1.35E-02 | 1/74 (1%)  |
| HER-2 Signaling in Breast Cancer                                                | 5.78E-01 | 1.32E-02 | 1/76 (1%)  |
| Role of Wnt/GSK-3 $\beta$ Signaling in the Pathogenesis of Influenza            | 5.78E-01 | 1.32E-02 | 1/76 (1%)  |
| VEGF Family Ligand-Receptor Interactions                                        | 5.78E-01 | 1.32E-02 | 1/76 (1%)  |
| Cyclins and Cell Cycle Regulation                                               | 5.73E-01 | 1.3E-02  | 1/77 (1%)  |
| PDGF Signaling                                                                  | 5.73E-01 | 1.3E-02  | 1/77 (1%)  |
| VDR/RXR Activation                                                              | 5.68E-01 | 1.28E-02 | 1/78 (1%)  |
| Acute Myeloid Leukemia Signaling                                                | 5.63E-01 | 1.27E-02 | 1/79 (1%)  |
| Regulation of IL-2 Expression in Activated and Anergic T Lymphocytes            | 5.63E-01 | 1.27E-02 | 1/79 (1%)  |
| G-Protein Coupled Receptor Signaling                                            | 5.6E-01  | 7.81E-03 | 2/256 (1%) |
| Prostate Cancer Signaling                                                       | 5.5E-01  | 1.22E-02 | 1/82 (1%)  |
| Melanocyte Development and Pigmentation Signaling                               | 5.41E-01 | 1.19E-02 | 1/84 (1%)  |
| ErbB Signaling                                                                  | 5.37E-01 | 1.18E-02 | 1/85 (1%)  |
| $\alpha$ -Adrenergic Signaling                                                  | 5.32E-01 | 1.16E-02 | 1/86 (1%)  |
| FAK Signaling                                                                   | 5.32E-01 | 1.16E-02 | 1/86 (1%)  |
| Neuregulin Signaling                                                            | 5.24E-01 | 1.14E-02 | 1/88 (1%)  |
| CTLA4 Signaling in Cytotoxic T Lymphocytes                                      | 5.24E-01 | 1.14E-02 | 1/88 (1%)  |
| RANK Signaling in Osteoclasts                                                   | 5.24E-01 | 1.14E-02 | 1/88 (1%)  |
| Regulation of Actin-based Motility                                              | 5.2E-01  | 1.12E-02 | 1/89 (1%)  |

|                                                                                |          |          |            |
|--------------------------------------------------------------------------------|----------|----------|------------|
| by Rho                                                                         |          |          |            |
| Virus Entry via Endocytic Pathways                                             | 5.2E-01  | 1.12E-02 | 1/89 (1%)  |
| Communication between Innate and Adaptive Immune Cells                         | 5.2E-01  | 1.12E-02 | 1/89 (1%)  |
| Glucocorticoid Receptor Signaling                                              | 5.17E-01 | 7.27E-03 | 2/275 (1%) |
| Factors Promoting Cardiogenesis in Vertebrates                                 | 5.12E-01 | 1.1E-02  | 1/91 (1%)  |
| Salvage Pathways of Pyrimidine Ribonucleotides                                 | 5.12E-01 | 1.1E-02  | 1/91 (1%)  |
| VEGF Signaling                                                                 | 5.12E-01 | 1.1E-02  | 1/91 (1%)  |
| Death Receptor Signaling                                                       | 5.08E-01 | 1.09E-02 | 1/92 (1%)  |
| PPAR Signaling                                                                 | 5.04E-01 | 1.08E-02 | 1/93 (1%)  |
| Mouse Embryonic Stem Cell Pluripotency                                         | 4.96E-01 | 1.05E-02 | 1/95 (1%)  |
| IGF-1 Signaling                                                                | 4.89E-01 | 1.03E-02 | 1/97 (1%)  |
| Amyotrophic Lateral Sclerosis Signaling                                        | 4.85E-01 | 1.02E-02 | 1/98 (1%)  |
| Telomerase Signaling                                                           | 4.85E-01 | 1.02E-02 | 1/98 (1%)  |
| CDK5 Signaling                                                                 | 4.82E-01 | 1.01E-02 | 1/99 (1%)  |
| Paxillin Signaling                                                             | 4.78E-01 | 1E-02    | 1/100 (1%) |
| Role of Macrophages, Fibroblasts and Endothelial Cells in Rheumatoid Arthritis | 4.77E-01 | 6.78E-03 | 2/295 (1%) |
| HIF1 $\alpha$ Signaling                                                        | 4.75E-01 | 9.9E-03  | 1/101 (1%) |
| Cholecystokinin/Gastrin-mediated Signaling                                     | 4.75E-01 | 9.9E-03  | 1/101 (1%) |
| Rac Signaling                                                                  | 4.68E-01 | 9.71E-03 | 1/103 (1%) |
| Pancreatic Adenocarcinoma Signaling                                            | 4.58E-01 | 9.43E-03 | 1/106 (1%) |
| Fc Epsilon RI Signaling                                                        | 4.51E-01 | 9.26E-03 | 1/108 (1%) |
| fMLP Signaling in Neutrophils                                                  | 4.51E-01 | 9.26E-03 | 1/108 (1%) |
| Renin-Angiotensin Signaling                                                    | 4.51E-01 | 9.26E-03 | 1/108 (1%) |
| Type I Diabetes Mellitus Signaling                                             | 4.51E-01 | 9.26E-03 | 1/108 (1%) |
| Natural Killer Cell Signaling                                                  | 4.48E-01 | 9.17E-03 | 1/109 (1%) |
| CCR3 Signaling in Eosinophils                                                  | 4.3E-01  | 8.7E-03  | 1/115 (1%) |
| IL-6 Signaling                                                                 | 4.27E-01 | 8.62E-03 | 1/116 (1%) |
| 14-3-3-mediated Signaling                                                      | 4.24E-01 | 8.55E-03 | 1/117 (1%) |
| PTEN Signaling                                                                 | 4.21E-01 | 8.47E-03 | 1/118 (1%) |
| Synaptic Long Term Potentiation                                                | 4.18E-01 | 8.4E-03  | 1/119 (1%) |
| HMGB1 Signaling                                                                | 4.18E-01 | 8.4E-03  | 1/119 (1%) |
| p70S6K Signaling                                                               | 4.18E-01 | 8.4E-03  | 1/119 (1%) |
| P2Y Purigenic Receptor Signaling Pathway                                       | 4.18E-01 | 8.4E-03  | 1/119 (1%) |
| RhoA Signaling                                                                 | 4.12E-01 | 8.26E-03 | 1/121 (1%) |
| PI3K/AKT Signaling                                                             | 4.07E-01 | 8.13E-03 | 1/123 (1%) |
| D-myo-inositol (1,4,5,6)-Tetrakisphosphate Biosynthesis                        | 3.99E-01 | 7.94E-03 | 1/126 (1%) |
| D-myo-inositol (3,4,5,6)-tetrakisphosphate Biosynthesis                        | 3.99E-01 | 7.94E-03 | 1/126 (1%) |
| PI3K Signaling in B Lymphocytes                                                | 3.96E-01 | 7.87E-03 | 1/127 (1%) |

|                                                                       |          |          |            |
|-----------------------------------------------------------------------|----------|----------|------------|
| Cellular Effects of Sildenafil (Viagra)                               | 3.93E-01 | 7.81E-03 | 1/128 (1%) |
| Estrogen Receptor Signaling                                           | 3.93E-01 | 7.81E-03 | 1/128 (1%) |
| Insulin Receptor Signaling                                            | 3.83E-01 | 7.58E-03 | 1/132 (1%) |
| Adipogenesis pathway                                                  | 3.81E-01 | 7.52E-03 | 1/133 (1%) |
| Cardiac $\beta$ -adrenergic Signaling                                 | 3.81E-01 | 7.52E-03 | 1/133 (1%) |
| Aryl Hydrocarbon Receptor Signaling                                   | 3.66E-01 | 7.19E-03 | 1/139 (1%) |
| Synaptic Long Term Depression                                         | 3.62E-01 | 7.09E-03 | 1/141 (1%) |
| D-myo-inositol-5-phosphate Metabolism                                 | 3.59E-01 | 7.04E-03 | 1/142 (1%) |
| 3-phosphoinositide Degradation                                        | 3.57E-01 | 6.99E-03 | 1/143 (1%) |
| Regulation of eIF4 and p70S6K Signaling                               | 3.53E-01 | 6.9E-03  | 1/145 (1%) |
| Epithelial Adherens Junction Signaling                                | 3.5E-01  | 6.85E-03 | 1/146 (1%) |
| Cdc42 Signaling                                                       | 3.38E-01 | 6.58E-03 | 1/152 (1%) |
| 3-phosphoinositide Biosynthesis                                       | 3.36E-01 | 6.54E-03 | 1/153 (1%) |
| Gap Junction Signaling                                                | 3.32E-01 | 6.45E-03 | 1/155 (1%) |
| Dopamine-DARPP32 Feedback in cAMP Signaling                           | 3.2E-01  | 6.21E-03 | 1/161 (1%) |
| Tight Junction Signaling                                              | 3.08E-01 | 5.99E-03 | 1/167 (1%) |
| Role of NFAT in Regulation of the Immune Response                     | 3.05E-01 | 5.92E-03 | 1/169 (1%) |
| Wnt/ $\beta$ -catenin Signaling                                       | 3.05E-01 | 5.92E-03 | 1/169 (1%) |
| Endothelin-1 Signaling                                                | 3.01E-01 | 5.85E-03 | 1/171 (1%) |
| CREB Signaling in Neurons                                             | 3.01E-01 | 5.85E-03 | 1/171 (1%) |
| RhoGDI Signaling                                                      | 3E-01    | 5.81E-03 | 1/172 (1%) |
| PPAR $\alpha$ /RXR $\alpha$ Activation                                | 2.98E-01 | 5.78E-03 | 1/173 (1%) |
| Ephrin Receptor Signaling                                             | 2.98E-01 | 5.78E-03 | 1/173 (1%) |
| Granulocyte Adhesion and Diapedesis                                   | 2.91E-01 | 5.65E-03 | 1/177 (1%) |
| Role of NFAT in Cardiac Hypertrophy                                   | 2.89E-01 | 5.62E-03 | 1/178 (1%) |
| NRF2-mediated Oxidative Stress Response                               | 2.88E-01 | 5.59E-03 | 1/179 (1%) |
| Production of Nitric Oxide and Reactive Oxygen Species in Macrophages | 2.86E-01 | 5.56E-03 | 1/180 (1%) |
| EIF2 Signaling                                                        | 2.84E-01 | 5.52E-03 | 1/181 (1%) |
| ILK Signaling                                                         | 2.78E-01 | 5.41E-03 | 1/185 (1%) |
| mTOR Signaling                                                        | 2.76E-01 | 5.38E-03 | 1/186 (1%) |
| ERK/MAPK Signaling                                                    | 2.76E-01 | 5.38E-03 | 1/186 (1%) |
| Agranulocyte Adhesion and Diapedesis                                  | 2.72E-01 | 5.29E-03 | 1/189 (1%) |
| RAR Activation                                                        | 2.7E-01  | 5.26E-03 | 1/190 (1%) |
| Superpathway of Inositol Phosphate Compounds                          | 2.7E-01  | 5.26E-03 | 1/190 (1%) |
| Breast Cancer Regulation by Stathmin1                                 | 2.69E-01 | 5.24E-03 | 1/191 (1%) |
| Systemic Lupus Erythematosus Signaling                                | 2.37E-01 | 4.67E-03 | 1/214 (0%) |

|                                 |          |          |            |
|---------------------------------|----------|----------|------------|
| Huntington's Disease Signaling  | 2.19E-01 | 4.39E-03 | 1/228 (0%) |
| Signaling by Rho Family GTPases | 2.14E-01 | 4.29E-03 | 1/233 (0%) |

**Table S6. Signaling pathways regulated by the microRNA 1896.** Ingenuity Canonical Pathways regulated by mmu-miRNA1896.

| Ingenuity Canonical Pathways                                | -log(p-value) | Ratio    | Overlaps with dataset |
|-------------------------------------------------------------|---------------|----------|-----------------------|
| TWEAK Signaling                                             | 4.17E00       | 8.82E-02 | 3/34 (9%)             |
| Lymphotoxin $\beta$ Receptor Signaling                      | 3.57E00       | 5.56E-02 | 3/54 (6%)             |
| Induction of Apoptosis by HIV1                              | 3.43E00       | 5E-02    | 3/60 (5%)             |
| Small Cell Lung Cancer Signaling                            | 3.22E00       | 4.23E-02 | 3/71 (4%)             |
| Death Receptor Signaling                                    | 2.89E00       | 3.26E-02 | 3/92 (3%)             |
| TNFR2 Signaling                                             | 2.68E00       | 6.9E-02  | 2/29 (7%)             |
| 4-1BB Signaling in T Lymphocytes                            | 2.63E00       | 6.45E-02 | 2/31 (6%)             |
| April Mediated Signaling                                    | 2.45E00       | 5.26E-02 | 2/38 (5%)             |
| Role of PKR in Interferon Induction and Antiviral Response  | 2.41E00       | 5E-02    | 2/40 (5%)             |
| B Cell Activating Factor Signaling                          | 2.41E00       | 5E-02    | 2/40 (5%)             |
| TNFR1 Signaling                                             | 2.25E00       | 4.17E-02 | 2/48 (4%)             |
| CD27 Signaling in Lymphocytes                               | 2.18E00       | 3.85E-02 | 2/52 (4%)             |
| Role of PI3K/AKT Signaling in the Pathogenesis of Influenza | 2.02E00       | 3.17E-02 | 2/63 (3%)             |
| CD40 Signaling                                              | 2E00          | 3.08E-02 | 2/65 (3%)             |
| Angiotensin Signaling                                       | 2E00          | 3.08E-02 | 2/65 (3%)             |
| PXR/RXR Activation                                          | 1.99E00       | 3.03E-02 | 2/66 (3%)             |
| Serine Biosynthesis                                         | 1.94E00       | 2E-01    | 1/5 (20%)             |
| Toll-like Receptor Signaling                                | 1.89E00       | 2.7E-02  | 2/74 (3%)             |
| Prostate Cancer Signaling                                   | 1.81E00       | 2.44E-02 | 2/82 (2%)             |
| Superpathway of Serine and Glycine Biosynthesis I           | 1.79E00       | 1.43E-01 | 1/7 (14%)             |
| Apoptosis Signaling                                         | 1.74E00       | 2.25E-02 | 2/89 (2%)             |
| Antioxidant Action of Vitamin C                             | 1.67E00       | 2.06E-02 | 2/97 (2%)             |
| Pancreatic Adenocarcinoma Signaling                         | 1.6E00        | 1.89E-02 | 2/106 (2%)            |
| Type I Diabetes Mellitus Signaling                          | 1.58E00       | 1.85E-02 | 2/108 (2%)            |
| Androgen Signaling                                          | 1.56E00       | 1.8E-02  | 2/111 (2%)            |
| Type II Diabetes Mellitus Signaling                         | 1.52E00       | 1.72E-02 | 2/116 (2%)            |
| IL-6 Signaling                                              | 1.52E00       | 1.72E-02 | 2/116 (2%)            |
| PTEN Signaling                                              | 1.51E00       | 1.69E-02 | 2/118 (2%)            |
| Vitamin-C Transport                                         | 1.49E00       | 7.14E-02 | 1/14 (7%)             |
| Hereditary Breast Cancer Signaling                          | 1.45E00       | 1.56E-02 | 2/128 (2%)            |
| Granzyme B Signaling                                        | 1.44E00       | 6.25E-02 | 1/16 (6%)             |
| Mismatch Repair in Eukaryotes                               | 1.44E00       | 6.25E-02 | 1/16 (6%)             |

|                                                                           |          |          |            |
|---------------------------------------------------------------------------|----------|----------|------------|
| Parkinson's Signaling                                                     | 1.44E00  | 6.25E-02 | 1/16 (6%)  |
| Aryl Hydrocarbon Receptor Signaling                                       | 1.38E00  | 1.44E-02 | 2/139 (1%) |
| Endoplasmic Reticulum Stress Pathway                                      | 1.32E00  | 4.76E-02 | 1/21 (5%)  |
| Tumoricidal Function of Hepatic Natural Killer Cells                      | 1.26E00  | 4.17E-02 | 1/24 (4%)  |
| Role of JAK1, JAK2 and TYK2 in Interferon Signaling                       | 1.26E00  | 4.17E-02 | 1/24 (4%)  |
| IL-17A Signaling in Gastric Cells                                         | 1.25E00  | 4E-02    | 1/25 (4%)  |
| IL-15 Production                                                          | 1.21E00  | 3.7E-02  | 1/27 (4%)  |
| Cytotoxic T Lymphocyte-mediated Apoptosis of Target Cells                 | 1.14E00  | 3.12E-02 | 1/32 (3%)  |
| MIF-mediated Glucocorticoid Regulation                                    | 1.13E00  | 3.03E-02 | 1/33 (3%)  |
| IL-9 Signaling                                                            | 1.12E00  | 2.94E-02 | 1/34 (3%)  |
| IL-17A Signaling in Fibroblasts                                           | 1.11E00  | 2.86E-02 | 1/35 (3%)  |
| Nucleotide Excision Repair Pathway                                        | 1.11E00  | 2.86E-02 | 1/35 (3%)  |
| Interferon Signaling                                                      | 1.09E00  | 2.78E-02 | 1/36 (3%)  |
| Docosahexaenoic Acid (DHA) Signaling                                      | 1.06E00  | 2.56E-02 | 1/39 (3%)  |
| MIF Regulation of Innate Immunity                                         | 1.04E00  | 2.44E-02 | 1/41 (2%)  |
| Role of Osteoblasts, Osteoclasts and Chondrocytes in Rheumatoid Arthritis | 1.04E00  | 9.17E-03 | 2/218 (1%) |
| Role of RIG1-like Receptors in Antiviral Innate Immunity                  | 1.02E00  | 2.33E-02 | 1/43 (2%)  |
| Role of IL-17F in Allergic Inflammatory Airway Diseases                   | 1.01E00  | 2.27E-02 | 1/44 (2%)  |
| iNOS Signaling                                                            | 1.01E00  | 2.27E-02 | 1/44 (2%)  |
| Huntington's Disease Signaling                                            | 1.01E00  | 8.77E-03 | 2/228 (1%) |
| Colorectal Cancer Metastasis Signaling                                    | 9.81E-01 | 8.47E-03 | 2/236 (1%) |
| Assembly of RNA Polymerase II Complex                                     | 9.58E-01 | 2E-02    | 1/50 (2%)  |
| Semaphorin Signaling in Neurons                                           | 9.42E-01 | 1.92E-02 | 1/52 (2%)  |
| Endometrial Cancer Signaling                                              | 9.42E-01 | 1.92E-02 | 1/52 (2%)  |
| Nur77 Signaling in T Lymphocytes                                          | 9.27E-01 | 1.85E-02 | 1/54 (2%)  |
| Role of IL-17A in Arthritis                                               | 9.27E-01 | 1.85E-02 | 1/54 (2%)  |
| Role of CHK Proteins in Cell Cycle Checkpoint Control                     | 9.19E-01 | 1.82E-02 | 1/55 (2%)  |
| Wnt/Ca <sup>+</sup> pathway                                               | 9.12E-01 | 1.79E-02 | 1/56 (2%)  |
| Myc Mediated Apoptosis Signaling                                          | 8.98E-01 | 1.72E-02 | 1/58 (2%)  |
| Retinoic acid Mediated Apoptosis Signaling                                | 8.77E-01 | 1.64E-02 | 1/61 (2%)  |
| Glucocorticoid Receptor Signaling                                         | 8.72E-01 | 7.27E-03 | 2/275 (1%) |
| Activation of IRF by Cytosolic Pattern Recognition Receptors              | 8.71E-01 | 1.61E-02 | 1/62 (2%)  |
| IL-15 Signaling                                                           | 8.64E-01 | 1.59E-02 | 1/63 (2%)  |
| Estrogen-Dependent Breast Cancer Signaling                                | 8.64E-01 | 1.59E-02 | 1/63 (2%)  |
| IL-17A Signaling in Airway Cells                                          | 8.58E-01 | 1.56E-02 | 1/64 (2%)  |
| Non-Small Cell Lung Cancer Signaling                                      | 8.52E-01 | 1.54E-02 | 1/65 (2%)  |
| Hypoxia Signaling in the Cardiovascular System                            | 8.52E-01 | 1.54E-02 | 1/65 (2%)  |
| Erythropoietin Signaling                                                  | 8.39E-01 | 1.49E-02 | 1/67 (1%)  |

|                                                                                |          |          |            |
|--------------------------------------------------------------------------------|----------|----------|------------|
| IL-10 Signaling                                                                | 8.33E-01 | 1.47E-02 | 1/68 (1%)  |
| Growth Hormone Signaling                                                       | 8.28E-01 | 1.45E-02 | 1/69 (1%)  |
| Role of Macrophages, Fibroblasts and Endothelial Cells in Rheumatoid Arthritis | 8.23E-01 | 6.78E-03 | 2/295 (1%) |
| Melatonin Signaling                                                            | 8.22E-01 | 1.43E-02 | 1/70 (1%)  |
| PEDF Signaling                                                                 | 8.16E-01 | 1.41E-02 | 1/71 (1%)  |
| IL-17 Signaling                                                                | 8.1E-01  | 1.39E-02 | 1/72 (1%)  |
| JAK/Stat Signaling                                                             | 8.1E-01  | 1.39E-02 | 1/72 (1%)  |
| LPS-stimulated MAPK Signaling                                                  | 8.05E-01 | 1.37E-02 | 1/73 (1%)  |
| NF- $\kappa$ B Activation by Viruses                                           | 8.05E-01 | 1.37E-02 | 1/73 (1%)  |
| TREM1 Signaling                                                                | 7.94E-01 | 1.33E-02 | 1/75 (1%)  |
| BMP signaling pathway                                                          | 7.94E-01 | 1.33E-02 | 1/75 (1%)  |
| HER-2 Signaling in Breast Cancer                                               | 7.89E-01 | 1.32E-02 | 1/76 (1%)  |
| OX40 Signaling Pathway                                                         | 7.89E-01 | 1.32E-02 | 1/76 (1%)  |
| Role of BRCA1 in DNA Damage Response                                           | 7.79E-01 | 1.28E-02 | 1/78 (1%)  |
| Acute Myeloid Leukemia Signaling                                               | 7.74E-01 | 1.27E-02 | 1/79 (1%)  |
| Regulation of IL-2 Expression in Activated and Anergic T Lymphocytes           | 7.74E-01 | 1.27E-02 | 1/79 (1%)  |
| Ceramide Signaling                                                             | 7.69E-01 | 1.25E-02 | 1/80 (1%)  |
| Altered T Cell and B Cell Signaling in Rheumatoid Arthritis                    | 7.4E-01  | 1.16E-02 | 1/86 (1%)  |
| RANK Signaling in Osteoclasts                                                  | 7.31E-01 | 1.14E-02 | 1/88 (1%)  |
| UVA-Induced MAPK Signaling                                                     | 7.31E-01 | 1.14E-02 | 1/88 (1%)  |
| Crosstalk between Dendritic Cells and Natural Killer Cells                     | 7.27E-01 | 1.12E-02 | 1/89 (1%)  |
| IL-1 Signaling                                                                 | 7.18E-01 | 1.1E-02  | 1/91 (1%)  |
| Chronic Myeloid Leukemia Signaling                                             | 7.14E-01 | 1.09E-02 | 1/92 (1%)  |
| PPAR Signaling                                                                 | 7.09E-01 | 1.08E-02 | 1/93 (1%)  |
| IGF-1 Signaling                                                                | 6.93E-01 | 1.03E-02 | 1/97 (1%)  |
| T Cell Receptor Signaling                                                      | 6.93E-01 | 1.03E-02 | 1/97 (1%)  |
| Amyotrophic Lateral Sclerosis Signaling                                        | 6.89E-01 | 1.02E-02 | 1/98 (1%)  |
| Molecular Mechanisms of Cancer                                                 | 6.84E-01 | 5.51E-03 | 2/363 (1%) |
| HIF1 $\alpha$ Signaling                                                        | 6.77E-01 | 9.9E-03  | 1/101 (1%) |
| Rac Signaling                                                                  | 6.7E-01  | 9.71E-03 | 1/103 (1%) |
| iCOS-iCOSL Signaling in T Helper Cells                                         | 6.59E-01 | 9.43E-03 | 1/106 (1%) |
| NGF Signaling                                                                  | 6.55E-01 | 9.35E-03 | 1/107 (1%) |
| fMLP Signaling in Neutrophils                                                  | 6.52E-01 | 9.26E-03 | 1/108 (1%) |
| Renin-Angiotensin Signaling                                                    | 6.52E-01 | 9.26E-03 | 1/108 (1%) |
| Sphingosine-1-phosphate Signaling                                              | 6.48E-01 | 9.17E-03 | 1/109 (1%) |
| CD28 Signaling in T Helper Cells                                               | 6.24E-01 | 8.62E-03 | 1/116 (1%) |
| PKC $\theta$ Signaling in T Lymphocytes                                        | 6.24E-01 | 8.62E-03 | 1/116 (1%) |
| G $\alpha$ 12/13 Signaling                                                     | 6.21E-01 | 8.55E-03 | 1/117 (1%) |
| p38 MAPK Signaling                                                             | 6.21E-01 | 8.55E-03 | 1/117 (1%) |
| HMGB1 Signaling                                                                | 6.15E-01 | 8.4E-03  | 1/119 (1%) |
| P2Y Purigenic Receptor Signaling Pathway                                       | 6.15E-01 | 8.4E-03  | 1/119 (1%) |

|                                                                              |          |          |            |
|------------------------------------------------------------------------------|----------|----------|------------|
| LXR/RXR Activation                                                           | 6.08E-01 | 8.26E-03 | 1/121 (1%) |
| Atherosclerosis Signaling                                                    | 6.05E-01 | 8.2E-03  | 1/122 (1%) |
| PI3K/AKT Signaling                                                           | 6.02E-01 | 8.13E-03 | 1/123 (1%) |
| Role of Pattern Recognition Receptors in Recognition of Bacteria and Viruses | 5.99E-01 | 8.06E-03 | 1/124 (1%) |
| PI3K Signaling in B Lymphocytes                                              | 5.9E-01  | 7.87E-03 | 1/127 (1%) |
| GNRH Signaling                                                               | 5.87E-01 | 7.81E-03 | 1/128 (1%) |
| Estrogen Receptor Signaling                                                  | 5.87E-01 | 7.81E-03 | 1/128 (1%) |
| Insulin Receptor Signaling                                                   | 5.76E-01 | 7.58E-03 | 1/132 (1%) |
| IL-12 Signaling and Production in Macrophages                                | 5.73E-01 | 7.52E-03 | 1/133 (1%) |
| Adipogenesis pathway                                                         | 5.73E-01 | 7.52E-03 | 1/133 (1%) |
| Relaxin Signaling                                                            | 5.68E-01 | 7.41E-03 | 1/135 (1%) |
| eNOS Signaling                                                               | 5.51E-01 | 7.09E-03 | 1/141 (1%) |
| Regulation of eIF4 and p70S6K Signaling                                      | 5.41E-01 | 6.9E-03  | 1/145 (1%) |
| Gαq Signaling                                                                | 5.36E-01 | 6.8E-03  | 1/147 (1%) |
| Aldosterone Signaling in Epithelial Cells                                    | 5.24E-01 | 6.58E-03 | 1/152 (1%) |
| Tec Kinase Signaling                                                         | 5.15E-01 | 6.41E-03 | 1/156 (1%) |
| Hepatic Cholestasis                                                          | 5.06E-01 | 6.25E-03 | 1/160 (1%) |
| Tight Junction Signaling                                                     | 4.9E-01  | 5.99E-03 | 1/167 (1%) |
| Acute Phase Response Signaling                                               | 4.86E-01 | 5.92E-03 | 1/169 (1%) |
| Mitochondrial Dysfunction                                                    | 4.86E-01 | 5.92E-03 | 1/169 (1%) |
| Role of NFAT in Regulation of the Immune Response                            | 4.86E-01 | 5.92E-03 | 1/169 (1%) |
| Endothelin-1 Signaling                                                       | 4.82E-01 | 5.85E-03 | 1/171 (1%) |
| CREB Signaling in Neurons                                                    | 4.82E-01 | 5.85E-03 | 1/171 (1%) |
| NF-κB Signaling                                                              | 4.82E-01 | 5.85E-03 | 1/171 (1%) |
| PPARα/RXRα Activation                                                        | 4.78E-01 | 5.78E-03 | 1/173 (1%) |
| Dendritic Cell Maturation                                                    | 4.76E-01 | 5.75E-03 | 1/174 (1%) |
| B Cell Receptor Signaling                                                    | 4.76E-01 | 5.75E-03 | 1/174 (1%) |
| AMPK Signaling                                                               | 4.68E-01 | 5.62E-03 | 1/178 (1%) |
| Production of Nitric Oxide and Reactive Oxygen Species in Macrophages        | 4.64E-01 | 5.56E-03 | 1/180 (1%) |
| EIF2 Signaling                                                               | 4.62E-01 | 5.52E-03 | 1/181 (1%) |
| Hepatic Fibrosis / Hepatic Stellate Cell Activation                          | 4.6E-01  | 5.49E-03 | 1/182 (1%) |
| IL-8 Signaling                                                               | 4.58E-01 | 5.46E-03 | 1/183 (1%) |
| Regulation of the Epithelial-Mesenchymal Transition Pathway                  | 4.56E-01 | 5.43E-03 | 1/184 (1%) |
| ILK Signaling                                                                | 4.54E-01 | 5.41E-03 | 1/185 (1%) |
| mTOR Signaling                                                               | 4.52E-01 | 5.38E-03 | 1/186 (1%) |
| ERK/MAPK Signaling                                                           | 4.52E-01 | 5.38E-03 | 1/186 (1%) |
| Thrombin Signaling                                                           | 4.47E-01 | 5.29E-03 | 1/189 (1%) |
| RAR Activation                                                               | 4.45E-01 | 5.26E-03 | 1/190 (1%) |
| Systemic Lupus Erythematosus Signaling                                       | 4.04E-01 | 4.67E-03 | 1/214 (0%) |
| Signaling by Rho Family GTPases                                              | 3.76E-01 | 4.29E-03 | 1/233 (0%) |
| Phospholipase C Signaling                                                    | 3.73E-01 | 4.26E-03 | 1/235 (0%) |
| Protein Ubiquitination Pathway                                               | 3.47E-01 | 3.92E-03 | 1/255 (0%) |



|                                      |          |          |            |
|--------------------------------------|----------|----------|------------|
| G-Protein Coupled Receptor Signaling | 3.45E-01 | 3.91E-03 | 1/256 (0%) |
| Xenobiotic Metabolism Signaling      | 3.3E-01  | 3.72E-03 | 1/269 (0%) |
| Protein Kinase A Signaling           | 2.28E-01 | 2.63E-03 | 1/380 (0%) |

**Table S7. Signaling pathways regulated by the microRNA 874.** Ingenuity Canonical Pathways regulated by mmu-miRNA 874.

| <b>Ingenuity Canonical Pathways</b>                                                                   | <b>-log(p-value)</b> | <b>Ratio</b> | <b>Overlaps with dataset</b> |
|-------------------------------------------------------------------------------------------------------|----------------------|--------------|------------------------------|
| L-cysteine Degradation III                                                                            | 1.91E00              | 5E-01        | 1/2 (50%)                    |
| Epithelial Adherens Junction Signaling                                                                | 1.89E00              | 2.74E-02     | 4/146 (3%)                   |
| Thiosulfate Disproportionation III (Rhodanese)                                                        | 1.74E00              | 3.33E-01     | 1/3 (33%)                    |
| Sertoli Cell-Sertoli Cell Junction Signaling                                                          | 1.61E00              | 2.25E-02     | 4/178 (2%)                   |
| Glycoaminoglycan-protein Linkage Region Biosynthesis                                                  | 1.37E00              | 1.43E-01     | 1/7 (14%)                    |
| PEDF Signaling                                                                                        | 1.15E00              | 2.82E-02     | 2/71 (3%)                    |
| Hematopoiesis from Multipotent Stem Cells                                                             | 1.15E00              | 8.33E-02     | 1/12 (8%)                    |
| Germ Cell-Sertoli Cell Junction Signaling                                                             | 1.12E00              | 1.89E-02     | 3/159 (2%)                   |
| TR/RXR Activation                                                                                     | 1.01E00              | 2.35E-02     | 2/85 (2%)                    |
| Differential Regulation of Cytokine Production in Macrophages and T Helper Cells by IL-17A and IL-17F | 9.78E-01             | 5.56E-02     | 1/18 (6%)                    |
| DNA Methylation and Transcriptional Repression Signaling                                              | 9.35E-01             | 5E-02        | 1/20 (5%)                    |
| Differential Regulation of Cytokine Production in Intestinal Epithelial Cells by IL-17A and IL-17F    | 8.78E-01             | 4.35E-02     | 1/23 (4%)                    |
| D-myo-inositol (1,4,5)-Trisphosphate Biosynthesis                                                     | 8.28E-01             | 3.85E-02     | 1/26 (4%)                    |
| Cell Cycle Control of Chromosomal Replication                                                         | 8.13E-01             | 3.7E-02      | 1/27 (4%)                    |
| Intrinsic Prothrombin Activation Pathway                                                              | 7.99E-01             | 3.57E-02     | 1/28 (4%)                    |
| Sonic Hedgehog Signaling                                                                              | 7.71E-01             | 3.33E-02     | 1/30 (3%)                    |
| Atherosclerosis Signaling                                                                             | 7.61E-01             | 1.64E-02     | 2/122 (2%)                   |
| TWEAK Signaling                                                                                       | 7.22E-01             | 2.94E-02     | 1/34 (3%)                    |
| Netrin Signaling                                                                                      | 6.69E-01             | 2.56E-02     | 1/39 (3%)                    |
| Thyroid Cancer Signaling                                                                              | 6.59E-01             | 2.5E-02      | 1/40 (3%)                    |
| iNOS Signaling                                                                                        | 6.23E-01             | 2.27E-02     | 1/44 (2%)                    |
| Serotonin Receptor Signaling                                                                          | 6.23E-01             | 2.27E-02     | 1/44 (2%)                    |
| Aldosterone Signaling in Epithelial Cells                                                             | 6.19E-01             | 1.32E-02     | 2/152 (1%)                   |
| MSP-RON Signaling Pathway                                                                             | 6.06E-01             | 2.17E-02     | 1/46 (2%)                    |
| Hematopoiesis from Pluripotent Stem Cells                                                             | 5.98E-01             | 2.13E-02     | 1/47 (2%)                    |
| Phototransduction Pathway                                                                             | 5.54E-01             | 1.89E-02     | 1/53 (2%)                    |

|                                                                   |          |          |            |
|-------------------------------------------------------------------|----------|----------|------------|
| Role of Cytokines in Mediating Communication between Immune Cells | 5.47E-01 | 1.85E-02 | 1/54 (2%)  |
| Chondroitin Sulfate Biosynthesis                                  | 5.47E-01 | 1.85E-02 | 1/54 (2%)  |
| RhoGDI Signaling                                                  | 5.43E-01 | 1.16E-02 | 2/172 (1%) |
| EGF Signaling                                                     | 5.33E-01 | 1.79E-02 | 1/56 (2%)  |
| Heparan Sulfate Biosynthesis                                      | 5.27E-01 | 1.75E-02 | 1/57 (2%)  |
| Dermatan Sulfate Biosynthesis                                     | 5.27E-01 | 1.75E-02 | 1/57 (2%)  |
| Granulocyte Adhesion and Diapedesis                               | 5.26E-01 | 1.13E-02 | 2/177 (1%) |
| Hypoxia Signaling in the Cardiovascular System                    | 4.8E-01  | 1.54E-02 | 1/65 (2%)  |
| Neurotrophin/TRK Signaling                                        | 4.69E-01 | 1.49E-02 | 1/67 (1%)  |
| Remodeling of Epithelial Adherens Junctions                       | 4.64E-01 | 1.47E-02 | 1/68 (1%)  |
| T Helper Cell Differentiation                                     | 4.59E-01 | 1.45E-02 | 1/69 (1%)  |
| Growth Hormone Signaling                                          | 4.59E-01 | 1.45E-02 | 1/69 (1%)  |
| LPS-stimulated MAPK Signaling                                     | 4.39E-01 | 1.37E-02 | 1/73 (1%)  |
| NF-κB Activation by Viruses                                       | 4.39E-01 | 1.37E-02 | 1/73 (1%)  |
| IL-4 Signaling                                                    | 4.39E-01 | 1.37E-02 | 1/73 (1%)  |
| PDGF Signaling                                                    | 4.21E-01 | 1.3E-02  | 1/77 (1%)  |
| Actin Cytoskeleton Signaling                                      | 4.2E-01  | 9.35E-03 | 2/214 (1%) |
| VDR/RXR Activation                                                | 4.17E-01 | 1.28E-02 | 1/78 (1%)  |
| Dopamine Receptor Signaling                                       | 4.17E-01 | 1.28E-02 | 1/78 (1%)  |
| Prostate Cancer Signaling                                         | 4E-01    | 1.22E-02 | 1/82 (1%)  |
| Cardiac Hypertrophy Signaling                                     | 3.98E-01 | 8.97E-03 | 2/223 (1%) |
| HIPPO signaling                                                   | 3.84E-01 | 1.16E-02 | 1/86 (1%)  |
| Regulation of Actin-based Motility by Rho                         | 3.73E-01 | 1.12E-02 | 1/89 (1%)  |
| Apoptosis Signaling                                               | 3.73E-01 | 1.12E-02 | 1/89 (1%)  |
| PPAR Signaling                                                    | 3.59E-01 | 1.08E-02 | 1/93 (1%)  |
| IGF-1 Signaling                                                   | 3.45E-01 | 1.03E-02 | 1/97 (1%)  |
| Cholecystokinin/Gastrin-mediated Signaling                        | 3.33E-01 | 9.9E-03  | 1/101 (1%) |
| Protein Ubiquitination Pathway                                    | 3.3E-01  | 7.84E-03 | 2/255 (1%) |
| Rac Signaling                                                     | 3.26E-01 | 9.71E-03 | 1/103 (1%) |
| IL-6 Signaling                                                    | 2.9E-01  | 8.62E-03 | 1/116 (1%) |
| 14-3-3-mediated Signaling                                         | 2.88E-01 | 8.55E-03 | 1/117 (1%) |
| p38 MAPK Signaling                                                | 2.88E-01 | 8.55E-03 | 1/117 (1%) |
| Gαi Signaling                                                     | 2.8E-01  | 8.33E-03 | 1/120 (1%) |
| phagosome maturation                                              | 2.8E-01  | 8.33E-03 | 1/120 (1%) |
| RhoA Signaling                                                    | 2.78E-01 | 8.26E-03 | 1/121 (1%) |
| Gustation Pathway                                                 | 2.78E-01 | 8.26E-03 | 1/121 (1%) |
| Cellular Effects of Sildenafil (Viagra)                           | 2.62E-01 | 7.81E-03 | 1/128 (1%) |
| Insulin Receptor Signaling                                        | 2.53E-01 | 7.58E-03 | 1/132 (1%) |
| Human Embryonic Stem Cell Pluripotency                            | 2.51E-01 | 7.52E-03 | 1/133 (1%) |
| 3-phosphoinositide Biosynthesis                                   | 2.13E-01 | 6.54E-03 | 1/153 (1%) |
| Gap Junction Signaling                                            | 2.09E-01 | 6.45E-03 | 1/155 (1%) |

**Table S8. Signaling pathways regulated by the microRNA 296-5p.** Ingenuity Canonical Pathways regulated by mmu-miRNA 296-5p.

|                              | <b>Control diet</b> | <b>Obesity-inducing diet (OID)</b> |
|------------------------------|---------------------|------------------------------------|
| Energy from fat (%)          | <b>17.2</b>         | <b>58.5</b>                        |
| Energy from protein (%)      | <b>18.6</b>         | <b>18.8</b>                        |
| Energy from carbohydrate (%) | <b>63.0</b>         | <b>22.8</b>                        |
| Kcal/gram                    | <b>3.8</b>          | <b>5.4</b>                         |

**Table S9. Composition and nutrient content in control and obesity-inducing (OID) diets.** Control and OID are AIN93G-based diets containing either 17% or 58 % energy from fat (sources: corn oil+ lard), respectively.

| <b>Name</b>    | <b>Maker</b>      | <b>Cat. Number</b> | <b>Dilution</b>      |
|----------------|-------------------|--------------------|----------------------|
| Actin          | Santa Cruz        | 7210               | 1:1000               |
| Tubulin        | Millipore         | AB3201             | 1:2000               |
| DNMT3A         | Cell Signaling    | 2160               | 1:1000               |
| VEGF-A         | Santa Cruz        | sc-152             | 1:1000 or 1:25 (IHC) |
| ER $\alpha$    | Santa Cruz        | sc-7207            | 1:1000               |
| MAPK           | Cell Signaling    | 9102               | 1:1000               |
| Phopo-MAPK     | Cell Signaling    | 9101               | 1:1000               |
| HIF-1 $\alpha$ | Novus Biologicals | 100-134            | 1:500 or 1:25 (IHC)  |
| CD31           | Abcam             | Ab-28364           | 1:25 (IHC)           |

**Table S10.** Specification for antibodies used in western-blot and immunohistochemistry (IHC) experiments.
